# Supplementary material for: Patient-centred care for addiction treatment: a scoping review protocol
Source: PubMed Central journal article supplement — BMJ Open. 2018 Dec 27;8(12):e024588. doi: 10.1136/bmjopen-2018-024588 (PMC6318507; doi:10.1136/bmjopen-2018-024588), 2018-12-27
Supplement: bmjopen-2018-024588.draft_revisions.pdf [file bmjopen-2018-024588.draft_revisions.pdf]

# BMJ Open

BMJ Open is committed to open peer review. As part of this commitment we make the peer review history of every article we publish publicly available.

When an article is published we post the peer reviewers' comments and the authors' responses online. We also post the versions of the paper that were used during peer review. These are the versions that the peer review comments apply to.

The versions of the paper that follow are the versions that were submitted during the peer review process. They are not the versions of record or the final published versions. They should not be cited or distributed as the published version of this manuscript.

BMJ Open is an open access journal and the full, final, typeset and author-corrected version of record of the manuscript is available on our site with no access controls, subscription charges or pay-per-view fees (<http://bmjopen.bmj.com>).

If you have any questions on BMJ Open's open peer review process please email [info.bmjopen@bmj.com](mailto:info.bmjopen@bmj.com)

# BMJ Open

## Patient-Centered Care for Addictions Treatment: A Scoping Review Protocol

|                               |                                                                                                                                                                                                                                                                                                                                                                                                                                                                                                                                                                                                                                                                                                                                                                                                  |
|-------------------------------|--------------------------------------------------------------------------------------------------------------------------------------------------------------------------------------------------------------------------------------------------------------------------------------------------------------------------------------------------------------------------------------------------------------------------------------------------------------------------------------------------------------------------------------------------------------------------------------------------------------------------------------------------------------------------------------------------------------------------------------------------------------------------------------------------|
| Journal:                      | <i>BMJ Open</i>                                                                                                                                                                                                                                                                                                                                                                                                                                                                                                                                                                                                                                                                                                                                                                                  |
| Manuscript ID                 | bmjopen-2018-024588                                                                                                                                                                                                                                                                                                                                                                                                                                                                                                                                                                                                                                                                                                                                                                              |
| Article Type:                 | Protocol                                                                                                                                                                                                                                                                                                                                                                                                                                                                                                                                                                                                                                                                                                                                                                                         |
| Date Submitted by the Author: | 03-Jun-2018                                                                                                                                                                                                                                                                                                                                                                                                                                                                                                                                                                                                                                                                                                                                                                                      |
| Complete List of Authors:     | Marchand, Kirsten; University of British Columbia, School of Population and Public Health; Centre for Health Evaluation and Outcome Sciences, Beaumont, Scott; University of British Columbia, School of Population and Public Health; Centre for Health Evaluation and Outcome Sciences, Westfall, Jordan; Canadian Association for People Who Use Drugs MacDonald, Scott; Providence Health Care, Crosstown Clinic Harrison, Scott; Providence Health Care, Crosstown Clinic Marsh, David; Northern Ontario School of Medicine, Schechter, Martin; University of British Columbia, SPPH; Centre for Health Evaluation and Outcome Sciences, Oviedo-Joekes, Eugenia; University of British Columbia, School of Population and Public Health; Centre for Health Evaluation and Outcome Sciences, |
| Keywords:                     | Patient-centered care, Client-centered care, Substance-related disorders, Problematic substance use, Addiction treatment                                                                                                                                                                                                                                                                                                                                                                                                                                                                                                                                                                                                                                                                         |
|                               |                                                                                                                                                                                                                                                                                                                                                                                                                                                                                                                                                                                                                                                                                                                                                                                                  |

SCHOLARONE™  
Manuscripts

Only

## Patient-Centered Care for Addictions Treatment: A Scoping Review Protocol

### Authors:

Kirsten Marchand<sup>1,2</sup>

Scott Beaumont<sup>1</sup>

Jordan Westfall<sup>3</sup>

Scott MacDonald<sup>4</sup>

Scott Harrison<sup>4</sup>

David C. Marsh<sup>5</sup>

Martin T. Schechter<sup>1,2</sup>

Eugenia Oviedo-Joekes<sup>1,2</sup>

### Author affiliation and addresses:

1. School of Population and Public Health, University of British Columbia, 2206 East Mall, Vancouver, BC, V6T 1Z3, Canada.
2. Centre for Health Evaluation & Outcome Sciences, Providence Health Care, St. Paul's Hospital, 575- 1081 Burrard St., Vancouver, BC, V6Z 1Y6, Canada.
3. Canadian Association for People Who Use Drugs, 46 East Hastings St., Vancouver, BC V6A 1N1, Canada.
4. Providence Health Care, Providence Crosstown Clinic, 84 West Hastings St., Vancouver, BC V6B 1G6, Canada.
5. Northern Ontario School of Medicine, 935 Ramsey Lake Road, Sudbury, ON P3E 2C6, Canada.

### Corresponding Author:

Kirsten Marchand

575-1081 Burrard St., Vancouver, BC, V6Z 1Y6, Canada.

[kmarchand@cheos.ubc.ca](mailto:kmarchand@cheos.ubc.ca)

778-847-8715

**Word count** (excluding title page, abstract, references, figures and tables): 2,915

**Keywords:** Patient-centered care; client-centered care; addiction treatment; substance-related disorders; problematic substance use

## ABSTRACT:

**Introduction:** Substance use disorders are chronic conditions that may benefit from expanded person-focused treatment approaches. Patient-centered care (PCC), commonly used for chronic conditions, is a structured treatment approach that responds to patients' unique needs and has been associated with positive outcomes (e.g., treatment retention, health outcomes). Despite its demonstrated effectiveness, evidence regarding its feasibility and potential outcomes among people with substance dependence remain limited. The aim of this scoping review is to explore how patient-centered care has been defined, measured and implemented among people with problematic substance use.

**Methods and analysis:** This scoping review follows the iterative stages of the Arksey and O'Malley framework. Both empirical (from Medline, Embase, PsycINFO, CINAHL and ISI Web of Science) and grey literature references will be considered if they focused on populations with problematic substance use and described or measured PCC or one of its components in a health-oriented context. Two reviewers will independently screen and review references. A descriptive overview, numerical summaries (where relevant) and a directed content analysis will be carried out on extracted data. This scoping review will be registered with Open Science Framework.

**Ethics and dissemination:** This review will generate evidence to inform decision-makers and health care providers on the feasibility, implications and potential outcomes associated with PCC for substance use treatment. A multidisciplinary team has been gathered to represent the needs of people with problematic substance use, health care providers and decision makers. The team's knowledge users will be engaged throughout this review and will participate in dissemination activities (e.g., workshops, presentations, publications, reports).

### ARTICLE SUMMARY: (Strengths and Limitations of this Study)

- This is the first scoping review to systematically explore how patient-centered care has been defined, measured and implemented among people with problematic substance use.
- A multidisciplinary team composed of drug policy advocates, health care providers, decision makers and academics will lead this scoping review.
- Both the population (people with problematic substance use) and concept of interest (patient-centered care) have been indexed using a variety of terms, which poses a challenge to ensuring breadth of the search.
- A comprehensive search strategy has been developed in consultation with a health sciences librarian to promote a sensitive scope of empirical and grey literature sources.
- This iterative scoping review study has been registered with Open Science Framework to enhance its transparency.

## 1. INTRODUCTION

Alcohol, tobacco and illicit substance use is a significant public health concern that accounts for 11.2% of the global burden of disease and 21.1% of all deaths.[1] People with substance use disorders are at an increased risk of mortality and morbidity;[2, 3] and some may be further affected by lost family and social support, criminal justice involvement, and social marginalization.[4] These associated harms highlight the multi-factorial nature of substance use disorders.[5, 6]

This multi-factorial nature, combined with the fact that drugs are subject to inconsistent policies (i.e., some are illegal, some are not),[7, 8] and affect the brain and body differently,[9] add to the complexity of its treatment. Effective pharmacological therapies are available to assist with the treatment of some, but not all, substance use disorders. For instance, for opioid use disorder, medication assisted treatment (e.g., oral methadone) has shown to be the most effective approach to reduce the use of illicit opioids and its associated harms.[10] On the other hand, psychosocial interventions (e.g., cognitive behavioural therapy; contingency management) can be very effective.[11-13] However, these approaches can be limited in their effectiveness at engaging and treating some populations (e.g., people with opioid use disorder or with severe mental comorbidities).[12-14] Both pharmacological and psychosocial interventions can be offered in a variety of settings (e.g., residential, community-based outpatient), delivered by different health care professionals (e.g., nurses, counselors, physicians), and with a wide range of outcome expectations (e.g., abstinence-oriented, harm reduction).[6, 15]

Despite variability in the settings, providers and expectations of substance use treatment, interventions are recommended to adopt a chronic, recovery-oriented approach,[16, 17] and one that adapts to the unique, person-specific, treatment needs.[6, 18] Indeed, evidence has shown that when clients' needs (e.g., housing, parenting support, medical care) are matched to the services offered, they are more likely to be retained to substance use treatment.[19-21] Patient-centered care (PCC) is a structured approach that encompasses these recommendations by prioritizing clients' unique goals, values, and involvement in the treatment and recovery process. As such, PCC warrants further consideration for efforts aimed at optimizing the responsiveness of substance use treatment to the individualized and long-term needs of its clients.

PCC has a longstanding history in clinical psychology, and has emerged in medicine over the past decade in efforts to improve the quality and effectiveness of health care, particularly for people with chronic illnesses.[22-24] This is not surprising, since research has shown PCC to be associated with treatment retention and adherence, treatment satisfaction, improved health outcomes, and quality of life.[23-25] The most common principles, as defined in concept analyses[26, 27] and reviews in the health sciences literature[24, 28, 29] are: (1) *understanding the whole person* to account for the biological, psychological and social aspects of patients' illnesses (i.e., holistic or comprehensive care); (2) *exploring the disease and illness experience* to understand the personal meaning of illness for the patient (i.e., person-focused or individualized care); (3) *finding common ground* where power, knowledge and responsibility are shared

1  
2  
3 between the patient and provider (i.e., shared-decision making or collaborative care); and (4)  
4 *enhancing the patient-provider relationship* to improve the positive outcomes of treatments  
5 provided (i.e., relational care).  
6

7  
8 For people with substance use disorders, research to date has focused on measuring specific  
9 principles or concepts that broadly overlap with PCC, such as individualized treatment  
10 preferences, needs and goals,[19, 30, 31] shared-decision making[32] or client autonomy[33] and  
11 relational care.[34, 35] These studies have been conducted with specific populations of people  
12 with substance use disorders (e.g., for people with primarily alcohol or opioid use disorder).  
13 However, the PCC principles that have been applied in this broad evidence base could be  
14 adapted into a variety of treatments and settings, which could yield significant opportunities that  
15 improve the quality of treatments for people with substance use disorders.  
16  
17

18  
19 To begin considering the potential benefits of PCC for people with substance use disorder, a  
20 comprehensive review of the existing evidence and grey literature is needed to gain initial  
21 understanding of what aspects of PCC have been empirically tested and clinically adopted.  
22 Bringing this evidence together in a systematic scoping review has the potential to inform future  
23 research and policy efforts aimed at designing and testing the effectiveness of a structured PCC  
24 approach for the treatment of substance use disorders. To our knowledge, no such review is  
25 currently available.  
26  
27

## 28 29 **2. OBJECTIVE**

30  
31 The present scoping review will systematically explore how patient-centered care has been  
32 defined, measured and implemented in health care settings for people with substance use  
33 disorders. Specifically, this review aims to examine the extent and nature of existing evidence of  
34 PCC in addiction research and clinical practice. This review will generate evidence to inform  
35 future directions for research and clinical practice design.  
36  
37

## 38 39 **3. METHODS AND ANALYSIS**

40  
41 This scoping review methodology will adopt the classic framework developed by Arksey and  
42 O'Malley,[36] and recent enhancements[37, 38, 39] including best practices for conducting and  
43 reporting systematic reviews (i.e., Preferred Reporting Items for Systematic Review and Meta-  
44 Analysis (PRISMA) or PRISMA for scoping reviews once available).[39-41] Accordingly, a  
45 reflexive and iterative approach will be maintained; particularly during the study selection and  
46 data extraction phases, which may become more refined throughout the review. All iterations of  
47 the protocol will be registered through Open Science Framework.[42] DistillerSR software for  
48 systematic reviews[43] will be used by both reviewers for screening, extraction, monitoring and  
49 to support synthesis and summarizing of findings.  
50  
51

### 52 53 **3.1. Stage 1: Defining the Research Question**

54  
55  
56  
57  
58

1  
2  
3 The research question was developed as a broad framing of the population (i.e., people with  
4 problematic substance use), the concept (i.e., patient-centered care) and the context (i.e., health-  
5 oriented settings) to be explored. Thus, this scoping review asks:  
6

- 7 1. What patient-centered care principles and outcomes have been empirically explored and  
8 implemented in health-oriented settings for people with problematic substance use?  
9

### 10 11 **3.2. Stage 2: Identifying Relevant Literature**

12 Our goal in developing this search strategy is to undertake a comprehensive review of the  
13 existing evidence base. However, this particular research question poses a challenge to keyword  
14 selection due to the evolution of terms used to describe both the population and concept of  
15 interest. For instance, problematic substance use has grown from the pejorative language of the  
16 ‘addict’ to a health-oriented view of ‘substance dependent populations’ and now onto the more  
17 person-focused discourse of ‘people with problematic substance use’.[44, 45] Likewise, patient-  
18 centered care has also been indexed using a variety of terms reflecting its progression from  
19 psychology (i.e., ‘client centered therapy’, ‘person-focused care’) to its recent arrival in medicine  
20 (i.e., ‘patient-centered care’). Adding to this complexity, specific PCC principles such as  
21 ‘collaborative care’, and ‘whole-person’ care have also been reported.[27, 29] To overcome this  
22 sensitivity-related challenge, we have engaged in an extensive consultation process with an  
23 experienced Health Science Librarian (at the University of British Columbia) as well as the  
24 knowledge users represented in our team (authors SM and SH). The search strategy will also be  
25 peer reviewed (i.e., PRESS) to promote its rigor and feasibility.[46]  
26

27 Given our interest in undertaking a comprehensive review of existing research and clinical  
28 guidelines related to PCC in the addictions field, both empirical (primary studies, previous  
29 reviews), and grey literature documents (conference abstracts, reports and clinical guidelines)  
30 will be included in our search. The search for empirical sources will be conducted in the most  
31 important electronic databases for the medical and social sciences: Medline (Ovid), Embase  
32 (Ovid), PsycINFO, CINAHL and ISI Web of Science. The search strategy will be developed in  
33 Medline (Ovid), will undergo PRESS, and will then be adapted to the other databases. The  
34 search strategy will include subject headings, related terms, and keywords as necessary for the  
35 research question. Boolean logic and operators (i.e., ‘and’, ‘or’, ‘not’) will be used to combine  
36 search terms and concepts.  
37

38 For the grey literature search strategy, we will utilize recommended resources[47] and consult  
39 with the Health Sciences Librarian and our team’s knowledge users to devise a database specific  
40 approach. The search for abstracts, reports and clinical guidelines will be carried out in several  
41 Canadian-specific databases: British Columbia Guidelines and Protocols Databases, CPG  
42 Infobase, the Registered Nurses’ Association Clinical Practice Guidelines Program, and Des  
43 Libris. For international grey literature documents, we will search National Guideline  
44 Clearinghouse, TRIP, Google and Google Scholar databases.  
45

### 46 47 **3.3. Stage 3: Study Selection**

1  
2  
3 A two-stage collaborative review process will be used to select references. Eligibility criteria  
4 have been developed *a priori*, in consultation with the study team. The screening form will be  
5 piloted on the first 20 citations of the initial Medline (Ovid) search to test both the criteria and  
6 reviewer agreement. Two independent reviewers (authors KM and SB) will apply eligibility  
7 criteria during the initial title/abstract review. After each review stage, the reviewer's agreement  
8 will be assessed and a third reviewer (author EOJ) will be consulted in cases of disagreement,  
9 until consensus is achieved.

10  
11  
12 A title/abstract (or executive summary for reports and guidelines) will be eligible for full text  
13 screening if it:

14  
15  
16 a) Referred to people with problematic substance use (including tobacco, alcohol, cannabis,  
17 stimulant or opioid use);

18  
19 b) Was about delivering patient-centered care or one of its components (including collaborative  
20 care, comprehensive care, care that enhances the patient-provider relationship, and care that  
21 attends to personal meaning of illness and recovery); and

22  
23 c) Was set in a health-oriented context (including inpatient or outpatient hospital settings,  
24 emergency departments, community-based or primary care health settings, and any specialized  
25 drug treatment or low-threshold agencies and programs; excluding prison-based health programs  
26 and self-help models such as narcotics or alcoholics anonymous);

27  
28  
29 d) Was published between January 1, 1960 and March 1, 2018 in English, French, Spanish,  
30 Italian, Portuguese and German.

31  
32 Full text empirical articles, reports and guidelines will then be obtained for titles/abstracts  
33 meeting these above criteria and will undergo further screening. In addition to the title/abstract  
34 criteria, full texts will be included in the review if:

35  
36  
37 e) It provided an operational definition of the patient-centered care framework that was delivered  
38 to people with problematic substance use in the health-oriented context; and

39  
40 f) It observed at least one outcome (e.g., treatment compliance, treatment satisfaction) of the  
41 patient-centered treatment approach (this criterion pertains to empirical articles only).

42  
43 As such, articles that provide only a recommendation to adopt PCC or an opinion of how PCC  
44 should be implemented in health-oriented settings for people with problematic substance use will  
45 not be included.

#### 46 47 48 **3.4. Stage 4: Data Extraction**

49  
50 Results of the search will be collated in DistillerSR,[43] allowing the research team to de-  
51 duplicate and perform data extraction. We will follow recommended data charting methods[36,  
52 41] to systematically capture relevant details for studies/reports and guidelines (Table 1). Data  
53 charting forms will be piloted with the first 5 empirical and grey literature references and may be  
54 adapted thereafter (with input from the teams' knowledge users).

**Table 1. Data extraction and charting for empirical and grey literature sources**

| Domain/Subdomain                                     | Description                                                                                                                                                                                                                                       |
|------------------------------------------------------|---------------------------------------------------------------------------------------------------------------------------------------------------------------------------------------------------------------------------------------------------|
| <b>1. General Document Details</b>                   |                                                                                                                                                                                                                                                   |
| 1.1 Reference Type                                   | Empirical study, case study, review, commentary, report, guideline                                                                                                                                                                                |
| 1.2 Publication Year                                 | Year of publication                                                                                                                                                                                                                               |
| 1.3 Country and Location                             | Country of publication (and location if provided)                                                                                                                                                                                                 |
| 1.4 Publication Language                             | Language of publication                                                                                                                                                                                                                           |
| <b>2. Empirical Study References (if applicable)</b> |                                                                                                                                                                                                                                                   |
| 2.1 Research objective                               | What was the research objective or specific question to be tested (if relevant)                                                                                                                                                                   |
| 2.2 Study design                                     | Was the study design observational, experimental or qualitative?                                                                                                                                                                                  |
| 2.3 Study population                                 | What were the eligibility criteria? Would the population be classified as primarily: tobacco, cannabis, alcohol, opioid, stimulant or comorbid substance use and mental illness?                                                                  |
| 2.4 Patient-centered care intervention               | What was the operational definition of patient-centered care used (including the definition of specific principles, if available)? How long was the intervention provided or observed for?                                                        |
| 2.5 Context/setting                                  | What health-oriented context was the PCC intervention apart of? What health professionals were involved?                                                                                                                                          |
| 2.6 Study outcomes                                   | For quantitative studies, what were the primary and secondary outcomes measured? For qualitative studies, what outcomes were described?                                                                                                           |
| 2.7 Important results                                | What were the main results of the study? Were there any important sub-group analyses (e.g., by sex and gender, by primary substance, by health care provider)?                                                                                    |
| 2.8 Limitations                                      | What limitations did the authors describe? What others might there be?                                                                                                                                                                            |
| <b>3. Grey Literature References (if applicable)</b> |                                                                                                                                                                                                                                                   |
| 3.1 Target audience                                  | Is there a target audience specified for the guideline/report (e.g., policy/decision maker, health care provider, patient/client/family)                                                                                                          |
| 3.2 Reference population                             | If available, how was the target patient population defined? Any specific eligibility criteria used? Would the population be classified as primarily: tobacco, cannabis, alcohol, opioid, stimulant or comorbid substance use and mental illness? |
| 3.3 Patient-centered care operational definition     | What was the operational definition of patient-centered care used (including the definition of specific principles, if available)?                                                                                                                |
| 3.4 Context/setting                                  | What health-oriented context was the PCC intervention apart of? What health professionals were involved?                                                                                                                                          |

|                               |                                                                                                                                                                                            |
|-------------------------------|--------------------------------------------------------------------------------------------------------------------------------------------------------------------------------------------|
| 3.5 Intervention and outcomes | If applicable, was a specific patient-centered intervention described (e.g., a training module, a clinical approach)? Were any outcomes reported (e.g., patient or provider satisfaction)? |
| 3.6 Program evaluation        | If available, results of any ongoing program evaluations?                                                                                                                                  |

### 3.5. Stage 5: Collating, Summarizing and Reporting the Results

We will present a descriptive overview (including numerical summaries; e.g., effect size if available) of the eligible full texts.[36] In addition to basic tables and charts of the studies and guidelines, we will also summarize studies by each broader category of substances primarily used (i.e., tobacco, cannabis, alcohol, opioid, or stimulant). Displaying information in this way will enhance understanding of population-specific similarities and differences in the patient-centered approach, its definition and outcomes. This will greatly facilitate the identification of future directions for research and practice. All tables and charts will include narrative summaries, relating the findings to the review's research question. Additionally, we will develop a final report of the review,[41] according to relevant aspects of the PRISMA guidelines.[39]

Given that this review aims to understand *how* PCC has been implemented in health care services for people with problematic substance use, a directed content analysis will be carried out on included guidelines. Specifically, we are interested in qualitatively analyzing the definition of PCC adopted in the guidelines, how they were developed, what health care providers were involved, and any outcomes or ongoing evaluations of the program. To do so, data from the guidelines will be imported to MAXQDA, version 12,[48] a qualitative analysis software program that supports a multi-user approach. This analysis will be conducted by authors KM, SB and EOJ, who have prior experience conducting thematic analysis on similar topics.[49, 50] As is common in directed content qualitative analysis,[51] a coding framework will be developed a priori, and will be applied by authors KM and SB independently. Results from this analysis will be summarized and where relevant numerical summaries may also be used to provide additional context to the themes (e.g., number of clients treated, number of staff).

### 3.6. Stage 6: Consultation Process and Engagement of Knowledge Users

The ultimate aim of this review is to generate evidence that can be used to inform decision-makers and health care providers on the feasibility, implications and potential outcomes associated with PCC for substance use treatment. To achieve this goal, we have engaged a multi-disciplinary team of knowledge users who represent the needs of people with problematic substance use, health care providers and decision makers. This team will be engaged at each stage of the project to discuss and refine eligibility criteria, data extraction and analysis. For example, our team's drug policy knowledge user (author JW) represents a national organization of people who use drugs and will contribute this critical perspective to ensure that all aspects of this review are rooted in the client-centered needs of this diverse population. Similarly, consulting with the team's health care providers (authors SM and SH) and decision-makers

(authors SH and DCM) will promote a methodology that reflects the realities of patient-provider roles and the health care system's organization. Lastly, through this team's diverse network, there will also be opportunities to disseminate findings directly to patients, health care providers, decision makers and drug policy experts. The planned consultation process will therefore empower knowledge users with a broad understanding of how PCC has been conceptually defined and its potential for improving health care outcomes among people with problematic substance use.

#### 4. DISCUSSION

As substance use disorders are increasingly recognized as chronic and relapsing conditions, the public health care system is considering how existing treatment and intervention approaches can be optimized to meet the long-term and evolving goals of clients.[18] A structured patient-centered approach may be one such opportunity. To our knowledge, this review will be the first to systematically examine the extent and nature of existing evidence of PCC in addiction research and clinical practice.

By taking into account both empirical and grey literature from the broader field of addictions, we will gain a comprehensive understanding of how PCC has been defined, measured and implemented. Specifically, empirical literature will provide evidence regarding the possible outcomes of PCC and grey literature (especially the reports and guidelines) will yield evidence informing how PCC has already been implemented in the various health-oriented contexts. Together, this evidence will inform the development of a consistent operational definition of PCC, which is needed for future standardization in clinical practice and ongoing measurement. Additionally, bringing this evidence together will provide a deeper understanding of the value that particular principles bring to treatment outcomes. For example, across populations and settings, we might find that shared-decision making is particularly beneficial for pharmacological medication adherence, while whole-person care improves health and social outcomes. These combined findings will provide a description of how PCC could be defined, implemented and tested. Such evidence is critical to offering clients the opportunity to participate in treatment that is comprehensive, individualized and empowering.

#### AUTHOR CONTRIBUTIONS:

KM (review guarantor) led the design and conceptualisation of this review and drafted the protocol with primary support from SB and EOJ. SB, SH, and EOJ were involved in refining the search strategy, including key words. SM, SH, and JW, were involved in establishing eligibility criteria and data extraction forms. All authors provided feedback on the manuscript and approval to the publishing of this protocol manuscript.

**AMENDMENTS:** Not applicable

1  
2  
3 **SUPPORT (SOURCES, SPONSOR, ROLE OF SPONSOR OR FUNDER):** Funding for this  
4 scoping review has been provided by the Canadian Institutes of Health Research (Operating  
5 Grant: Opioid Crisis Knowledge Synthesis). We would also like to acknowledge Ursula Ellis,  
6 Health Sciences Librarian (University of British Columbia), who has provided invaluable  
7 expertise to the search strategy of this scoping review.  
8  
9

10  
11 **COMPETING INTERESTS:** The authors have no competing interests to declare.  
12  
13  
14  
15  
16  
17  
18  
19  
20  
21  
22  
23  
24  
25  
26  
27  
28  
29  
30  
31  
32  
33  
34  
35  
36  
37  
38  
39  
40  
41  
42  
43  
44  
45  
46  
47  
48  
49  
50  
51  
52  
53  
54  
55  
56  
57  
58

## References

- 1 Gakidou E, Afshin A, Abajobir AA, et al. Global, regional, and national comparative risk assessment of 84 behavioural, environmental and occupational, and metabolic risks or clusters of risks, 1990-2016: A systematic analysis for the Global Burden of Disease Study 2016. *The Lancet* 2017;390:1345-422. doi: 10.1016/S0140-6736(17)32366-8
- 2 Holford TR, Meza R, Warner KE, et al. Tobacco control and the reduction in smoking-related premature deaths in the united states, 1964-2012. *JAMA* 2014;311(2):164-71. doi: 10.1001/jama.2013.285112
- 3 Whiteford HA, Degenhardt L, Rehm J, et al. Global burden of disease attributable to mental and substance use disorders: findings from the Global Burden of Disease Study 2010. *Lancet* 2013;382:1575-86. doi: 10.1016/s0140-6736(13)61611-6 [published Online First: 2013/09/03]
- 4 Nutt DJ, King LA, Phillips LD. Drug harms in the UK: a multicriteria decision analysis. *Lancet* 2010;376:1558-65. doi: [http://dx.doi.org/10.1016/S0140-6736\(10\)61462-6](http://dx.doi.org/10.1016/S0140-6736(10)61462-6)
- 5 American Psychiatric Association. Diagnostic and statistical manual of mental disorders (DSM-5®). Arlington, VA: American Psychiatric Publishing; 2013.
- 6 United Nations Office on Drugs and Crime. World Drug Report 2015. United Nations publication 2015.
- 7 Pompidou Group. Policy paper providing guidance to policy makers for developing coherent policies for licit and illicit drugs. Strasbourg: Council of Europe; 2011.
- 8 United Nations Office on Drugs and Crime (UNODC). World Drug Report 2017. United Nations publication 2017.
- 9 Egervari G, Ciccocioppo R, Jentsch JD, et al. Shaping vulnerability to addiction - the contribution of behavior, neural circuits and molecular mechanisms. *Neurosci Biobehav Rev* 2018;85:117-25. doi: 10.1016/j.neubiorev.2017.05.019 [published Online First: 2017/06/03]
- 10 Mattick RP, Breen C, Kimber J, et al. Methadone maintenance therapy versus no opioid replacement therapy for opioid dependence. *Cochrane Database Syst Rev* 2009;2:1-34.
- 11 Fischer B, Blanken P, Da Silveira D, et al. Effectiveness of secondary prevention and treatment interventions for crack-cocaine abuse: a comprehensive narrative overview of English-language studies. *Int J Drug Policy* 2015;26:352-63. doi: 10.1016/j.drugpo.2015.01.002 [published Online First: 2015/02/11]
- 12 Jhanjee S. Evidence Based Psychosocial Interventions in Substance Use. *Indian Journal of Psychological Medicine* 2014;36:112-18. doi: 10.4103/0253-7176.130960

- 1  
2  
3 13 Magill M, Ray LA. Cognitive-Behavioral Treatment With Adult Alcohol and Illicit Drug  
4 Users: A Meta-Analysis of Randomized Controlled Trials. *Journal of Studies on Alcohol and*  
5 *Drugs* 2009;70:516-27. doi: 10.15288/jsad.2009.70.516  
6  
7  
8 14 Hunt GE, Siegfried N, Morley K, et al. Psychosocial interventions for people with both  
9 severe mental illness and substance misuse. *Schizophr Bull* 2014;40:18-20. doi:  
10 10.1093/schbul/sbt160 [published Online First: 2013/11/02]  
11  
12 15 Sumnall HR, Bates, G., Jones, L. Evidence review summary: drug demand reduction,  
13 treatment and harm reduction. In: European Monitoring Centre for Drugs and Drug  
14 Addiction, ed. Health and social responses to drug problems: a European guide. United  
15 Kingdom 2017.  
16  
17  
18 16 McLellan AT, McKay JR, Forman R, et al. Reconsidering the evaluation of addiction  
19 treatment: from retrospective follow-up to concurrent recovery monitoring. *Addiction*  
20 2005;100:447-58. doi: 10.1111/j.1360-0443.2005.01012.x [published Online First:  
21 2005/03/24]  
22  
23  
24 17 Recovery Orientated Drug Treatment Expert Group. Medications in Recovery: Re-  
25 orienting Drug Dependence Treatment. London, UK: National Treatment Agency for  
26 Substance Misuse 2012.  
27  
28  
29 18 European Drug Monitoring Centre for Drugs and Drug Addiction. Health and social  
30 responses to drug problems: a European guide. Luxembourg: Publications Office of the  
31 European Union 2017.  
32  
33  
34 19 Hser YI, Polinsky ML, Maglione M, et al. Matching clients' needs with drug treatment  
35 services. *J Subst Abuse Treat* 1999;16:299-305. [published Online First: 1999/06/01]  
36  
37 20 Friedmann PD, Hendrickson JC, Gerstein DR, et al. The effect of matching comprehensive  
38 services to patients' needs on drug use improvement in addiction treatment. *Addiction*  
39 2004;99:962-72. doi: 10.1111/j.1360-0443.2004.00772.x [published Online First:  
40 2004/07/22]  
41  
42 21 Marsh JC, Cao D, Shin HC. Closing the Need-Service Gap: Gender Differences in Matching  
43 Services to Client Needs in Comprehensive Substance Abuse Treatment. *Social work*  
44 *research* 2009;33:183-92. [published Online First: 2009/09/01]  
45  
46  
47 22 Beaulieu MD. President's message: toward a patient-centred health care system. *Can*  
48 *Fam Physician* 2013;59:109,10. [published Online First: 2013/01/24]  
49  
50 23 Epstein RM, Fiscella K, Lesser CS, et al. Why the nation needs a policy push on patient-  
51 centered health care. *Health Aff (Millwood)* 2010;29:1489-95. doi:  
52 10.1377/hlthaff.2009.0888 [published Online First: 2010/08/04]  
53  
54  
55  
56  
57  
58

- 1  
2  
3 24 McMillan SS, Kendall E, Sav A, et al. Patient-centered approaches to health care: a  
4 systematic review of randomized controlled trials. *Medical care research and review: MCRR*  
5 2013;70:567-96. doi: 10.1177/1077558713496318 [published Online First: 2013/07/31]  
6  
7 25 Stewart M, Brown JB, Donner A, et al. The impact of patient-centered care on outcomes. *J*  
8 *Fam Pract* 2000;49:796-804. [published Online First: 2000/10/14]  
9  
10 26 Slater L. Person-centredness: a concept analysis. *Contemp Nurse* 2006;23(1):135-44.  
11 doi: 10.5555/conu.2006.23.1.135 [published Online First: 2006/11/07]  
12  
13 27 Morgan S, Yoder LH. A concept analysis of person-centered care. *J Holist Nurs*  
14 2012;30:6-15. doi: 10.1177/0898010111412189 [published Online First: 2011/07/21]  
15  
16 28 Hudon C, Fortin M, Haggerty JL, et al. Measuring patients' perceptions of patient-  
17 centered care: a systematic review of tools for family medicine. *Ann Fam Med* 2011;9:155-  
18 64. doi: 10.1370/afm.1226 [published Online First: 2011/03/16]  
19  
20 29 Mead N, Bower P. Patient-centredness: a conceptual framework and review of the  
21 empirical literature. *Soc Sci Med* 2000;51:1087-110. [published Online First: 2000/09/27]  
22  
23 30 Uebelacker LA, Bailey G, Herman D, et al. Patients' beliefs about medications are  
24 associated with stated preference for methadone, buprenorphine, naltrexone, or no  
25 medication-assisted therapy following inpatient opioid detoxification. *Journal of substance*  
26 *abuse treatment* 2016;66:48-53. doi: 10.1016/j.jsat.2016.02.009  
27  
28 31 Joosten EAG, De Weert-Van Oene GH, Sensky T, et al. Treatment Goals in Addiction  
29 Healthcare: the Perspectives of Patients and Clinicians. *International Journal of Social*  
30 *Psychiatry* 2010;57:263-76. doi: 10.1177/0020764009354835  
31  
32 32 Joosten EA, De Jong CA, de Weert-van Oene GH, et al. Shared decision-making: increases  
33 autonomy in substance-dependent patients. *Subst Use Misuse* 2011;46:1037-8. doi:  
34 10.3109/10826084.2011.552931 [published Online First: 2011/03/05]  
35  
36 33 Schwartz RP, Kelly SM, Mitchell SG, et al. Patient-Centered Methadone Treatment: A  
37 Randomized Clinical Trial. *Addiction* 2016 doi: 10.1111/add.13622 [published Online First:  
38 2016/09/24]  
39  
40 34 Joosten E, de Weert G, Sensky T, et al. Effect of shared decision-making on therapeutic  
41 alliance in addiction health care. *Patient Prefer Adherence* 2008;2:277-85. [published  
42 Online First: 2008/01/01]  
43  
44 35 Meier PS, Barrowclough C, Donmall MC. The role of the therapeutic alliance in the  
45 treatment of substance misuse: a critical review of the literature. *Addiction* 2005;100:304-  
46 16.  
47  
48  
49  
50  
51  
52  
53  
54  
55  
56  
57  
58  
59  
60

- 1  
2  
3 36 Arksey H, O'Malley L. Scoping studies: towards a methodological framework.  
4 *International Journal of Social Research Methodology* 2005;8:19-32. doi:  
5 10.1080/1364557032000119616  
6  
7 37 Levac D, Colquhoun H, O'Brien KK. Scoping studies: advancing the methodology.  
8 *Implementation Science* 2010;5:69. doi: 10.1186/1748-5908-5-69  
9  
10 38 Daudt HM, van Mossel C, Scott SJ. Enhancing the scoping study methodology: a large,  
11 inter-professional team's experience with Arksey and O'Malley's framework. *BMC Medical*  
12 *Research Methodology* 2013;13:48. doi: 10.1186/1471-2288-13-48  
13  
14 39 Colquhoun HL, Levac D, O'Brien KK, et al. Scoping reviews: time for clarity in definition,  
15 methods, and reporting. *J Clin Epidemiol* 2014;67:1291-4. doi:  
16 10.1016/j.jclinepi.2014.03.013 [published Online First: 2014/07/19]  
17  
18 40 Tricco A, Straus, S., Moher, D. Preferred reporting items for systematic reviews and  
19 meta-analysis: extension for Scoping Reviews (PRISMA-ScR): EQUATOR Network;  
20 Available from: [http://www.equator-network.org/wp-](http://www.equator-network.org/wp-content/uploads/2009/02/Executive-summary_ScR_Dec-9.pdf)  
21 [content/uploads/2009/02/Executive-summary\\_ScR\\_Dec-9.pdf](http://www.equator-network.org/wp-content/uploads/2009/02/Executive-summary_ScR_Dec-9.pdf) (accessed November 22,  
22 2017.)  
23  
24 41 Joanna Briggs Institute. The Joanna Briggs Institute Reviewers' Manual 2015:  
25 Methodology for JBI Scoping Reviews. Australia 2015.  
26  
27 42 Center for Open Science. Open Science Framework Charlottesville, VA2011 [cited 2018].  
28 Available from: <https://osf.io> (accessed May 7, 2018).  
29  
30 43 DistillerSR: Systematic Review and Literature Review Software [program]. Ottawa,  
31 Canada: Evidence Partners, 2016.  
32  
33 44 Kelly JF, Saitz R, Wakeman S. Language, Substance Use Disorders, and Policy: The Need  
34 to Reach Consensus on an "Addiction-ary". *Alcoholism Treatment Quarterly* 2016;34:116-  
35 23. doi: 10.1080/07347324.2016.1113103  
36  
37 45 Broyles LM, Binswanger IA, Jenkins JA, et al. Confronting inadvertent stigma and  
38 pejorative language in addiction scholarship: a recognition and response. *Subst Abus*  
39 2014;35:217-21. doi: 10.1080/08897077.2014.930372 [published Online First:  
40 2014/06/10]  
41  
42 46 McGowan J, Sampson M, Salzwedel DM, et al. PRESS Peer Review of Electronic Search  
43 Strategies: 2015 Guideline Statement. *J Clin Epidemiol* 2016;75:40-6. doi:  
44 10.1016/j.jclinepi.2016.01.021 [published Online First: 2016/03/24]  
45  
46 47 Canadian Agency for Drugs and Technologies in Health. Grey Matters: a practical tool for  
47 searching health-related grey literature. [online resource]. 2015 Available from:  
48 <https://www.cadth.ca/resources/finding-evidence/grey-matters> accessed November 22,  
49 2017.  
50  
51  
52  
53  
54  
55  
56  
57  
58

1  
2  
3 48 MAXQDA Qualitative Analysis Software, 2015.  
4

5 49 Oviedo-Joekes E, Marchand K, Lock K, et al. A chance to stop and breathe: participants'  
6 experiences in the North American Opiate Medication Initiative clinical trial. *Addiction*  
7 *science & clinical practice* 2014;9:21-31. doi: 10.1186/1940-0640-9-21 [published Online  
8 First: 2014/09/30]  
9

10  
11 50 Oviedo-Joekes E, Marchand K, Palis H, et al. Predictors of treatment allocation guesses in  
12 a randomized controlled trial testing double-blind injectable hydromorphone and  
13 diacetylmorphine for severe opioid use disorder. *Addiction Research & Theory*  
14 2017;25:263-72. doi: 10.1080/16066359.2016.1263729  
15

16  
17 51 Hsieh H-F, Shannon SE. Three Approaches to Qualitative Content Analysis. *Qualitative*  
18 *Health Research* 2005;15:1277-88. doi: 10.1177/1049732305276687  
19  
20  
21  
22  
23  
24  
25  
26  
27  
28  
29  
30  
31  
32  
33  
34  
35  
36  
37  
38  
39  
40  
41  
42  
43  
44  
45  
46  
47  
48  
49  
50  
51  
52  
53  
54  
55  
56  
57  
58

1  
2  
3  
4  
5  
6  
7  
8  
9  
10  
11  
12  
13  
14  
15  
16  
17  
18  
19  
20  
21  
22  
23  
24  
25  
26  
27  
28  
29  
30  
31  
32  
33  
34  
35  
36  
37  
38  
39  
40  
41  
42  
43  
44  
45  
46  
47  
48  
49  
50  
51  
52  
53  
54  
55  
56  
57  
58  
59  
60

### Supplement Table: Ovid-Medline Search Strategy

| Search number | Search term that entered to Ovid-Medline                                                     | No. of Hits <sup>a</sup> |
|---------------|----------------------------------------------------------------------------------------------|--------------------------|
| 1             | exp Substance-Related Disorders                                                              | 258404                   |
| 2             | exp Street Drugs                                                                             | 11238                    |
| 3             | substance abus*                                                                              | 49574                    |
| 4             | substance dependen*                                                                          | 2731                     |
| 5             | substance misus*                                                                             | 2166                     |
| 6             | Problematic substance adj2 (use* or usage or using)                                          | 254                      |
| 7             | (people who inject drug*) or PWID                                                            | 1767                     |
| 8             | injection drug "(use or user or usage or using)" or IDU                                      | 2800                     |
| 9             | "people who use drugs" or PWUD                                                               | 348                      |
| 10            | (illicit or street or illegal) adj2 (drug or substance) adj2 (use* or usage or using)        | 5855                     |
| 11            | opioid adj2 (addict* or abus* or dependen* or misus* or problem* or disorder*)               | 15436                    |
| 12            | opiate adj2 (addict* or abus* or dependen* or misus* or problem* or disorder*)               | 3474                     |
| 13            | narcotic adj2 (addict* or abus* or dependen* or misus* or problem* or disorder*)             | 1278                     |
| 14            | heroin                                                                                       | 17876                    |
| 15            | "stimulant use disorder"                                                                     | 41                       |
| 16            | exp crack cocaine                                                                            | 1343                     |
| 17            | exp cocaine smoking                                                                          | 3                        |
| 18            | ((cocaine or crack) adj2 (addict* or abus* or dependen* or misus* or problem* or disorder*)) | 11821                    |

|    |                                                                                                                                         |        |
|----|-----------------------------------------------------------------------------------------------------------------------------------------|--------|
| 19 | (amphetamine or crystal methamphetamine or crystal meth) adj1 (addict* or abus* or dependen* or misus* or problem* or disorder*)        | 591    |
| 20 | alcohol adj2 (addict* or abus* or dependen* or misus* or problem* or disorder*)                                                         | 50198  |
| 21 | cannabis adj2 (addict* or abus* or dependen* or disorder*)                                                                              | 1917   |
| 22 | (tobacco or nicotine or smok*) adj2 (dependen* or disorder* or cessation)                                                               | 45596  |
| 23 | Diagnosis, Dual (Psychiatry)                                                                                                            | 3378   |
| 24 | 1 or 2 or 3 or 4 or 5 or 6 or 7 or 8 or 9 or 10 or 11 or 12 or 13 or 14 or 15 or 16 or 17 or 18 or 19 or 20 or 21 or 22 or 23           | 337401 |
| 25 | exp Patient-Centered Care                                                                                                               | 16521  |
| 26 | ((patient or client or person) adj1 cent?red adj1 (care or treatment* or therap*))                                                      | 20613  |
| 27 | ((patient or client or person) adj1 focus?ed adj1 (care or treatment* or therap*))                                                      | 425    |
| 28 | Patient participation                                                                                                                   | 22542  |
| 29 | collaborative adj1 (care or practic* or treatment* or plan*)                                                                            | 3781   |
| 30 | (shared or joint or collaborative) adj2 decision making                                                                                 | 6241   |
| 31 | Comprehensive health care                                                                                                               | 6395   |
| 32 | Professional-Patient Relations                                                                                                          | 25040  |
| 33 | therapeutic alliance                                                                                                                    | 2068   |
| 34 | relational practic*                                                                                                                     | 45     |
| 35 | (professional or physician or doctor or nurse or health professional or health provider) adj1 patient adj1 (relationship* or alliance*) | 21872  |
| 36 | (professional or physician or doctor or nurse or health professional or health provider) adj1 patient adj1 communication*               | 3015   |
| 37 | Holistic Nursing                                                                                                                        | 3453   |
| 38 | trauma adj1 (cent?red or informed) adj1 (care or approach or treatment* or therap*)                                                     | 262    |

|    |                                                                                                    |        |
|----|----------------------------------------------------------------------------------------------------|--------|
| 39 | cultural* adj1 (safe or sensitive) adj1 (care or approach or treatment* or therap*)                | 394    |
| 40 | Family Systems Nursing                                                                             | 64     |
| 41 | Expert patient program*                                                                            | 27     |
| 42 | 25 or 26 or 27 or 28 or 29 or 30 or 31 or 32 or 33 or 34 or 35 or 36 or 37 or 38 or 39 or 40 or 41 | 106450 |
| 43 | 24 and 42                                                                                          | 2598   |

Notes: a) Run date: May 22 2018

# PRISMA-P Checklist

|    |                           | Reporting Item                                                                                                                                                                                                                   | Page Number |
|----|---------------------------|----------------------------------------------------------------------------------------------------------------------------------------------------------------------------------------------------------------------------------|-------------|
| 10 | Identification            | #1a Identify the report as a protocol of a systematic review                                                                                                                                                                     | 1           |
| 12 | Update                    | #1b If the protocol is for an update of a previous systematic review, identify as such                                                                                                                                           | NA          |
| 16 |                           | #2 If registered, provide the name of the registry (such as PROSPERO) and registration number                                                                                                                                    | 2           |
| 20 | Contact                   | #3a Provide name, institutional affiliation, e-mail address of all protocol authors; provide physical mailing address of corresponding author                                                                                    | 1           |
| 25 | Contribution              | #3b Describe contributions of protocol authors and identify the guarantor of the review                                                                                                                                          | 9           |
| 29 |                           | #4 If the protocol represents an amendment of a previously completed or published protocol, identify as such and list changes; otherwise, state plan for documenting important protocol amendments                               | NA          |
| 36 | Sources                   | #5a Indicate sources of financial or other support for the review                                                                                                                                                                | 10          |
| 38 | Sponsor                   | #5b Provide name for the review funder and / or sponsor                                                                                                                                                                          | 10          |
| 41 | Role of sponsor or funder | #5c Describe roles of funder(s), sponsor(s), and / or institution(s), if any, in developing the protocol                                                                                                                         | 10          |
| 44 | Rationale                 | #6 Describe the rationale for the review in the context of what is already known                                                                                                                                                 | 3           |
| 48 | Objectives                | #7 Provide an explicit statement of the question(s) the review will address with reference to participants, interventions, comparators, and outcomes (PICO)                                                                      | 4           |
| 54 | Eligibility criteria      | #8 Specify the study characteristics (such as PICO, study design, setting, time frame) and report characteristics (such as years considered, language, publication status) to be used as criteria for eligibility for the review | 6           |

|    |                    |      |                                                                                 |          |
|----|--------------------|------|---------------------------------------------------------------------------------|----------|
| 1  | Information        | #9   | Describe all intended information sources (such as electronic                   | 5        |
| 2  | sources            |      | databases, contact with study authors, trial registers or other                 |          |
| 3  |                    |      | grey literature sources) with planned dates of coverage                         |          |
| 4  |                    |      |                                                                                 |          |
| 5  |                    |      |                                                                                 |          |
| 6  | Search strategy    | #10  | Present draft of search strategy to be used for at least one                    | 16       |
| 7  |                    |      | electronic database, including planned limits, such that it                     |          |
| 8  |                    |      | could be repeated                                                               |          |
| 9  |                    |      |                                                                                 |          |
| 10 |                    |      |                                                                                 |          |
| 11 | Study records -    | #11a | Describe the mechanism(s) that will be used to manage                           | 4        |
| 12 | data management    |      | records and data throughout the review                                          |          |
| 13 |                    |      |                                                                                 |          |
| 14 |                    |      |                                                                                 |          |
| 15 | Study records -    | #11b | State the process that will be used for selecting studies (such                 | 6        |
| 16 | selection process  |      | as two independent reviewers) through each phase of the                         |          |
| 17 |                    |      | review (that is, screening, eligibility and inclusion in meta-                  |          |
| 18 |                    |      | analysis)                                                                       |          |
| 19 |                    |      |                                                                                 |          |
| 20 |                    |      |                                                                                 |          |
| 21 |                    |      |                                                                                 |          |
| 22 | Study records -    | #11c | Describe planned method of extracting data from reports                         | 7        |
| 23 | data collection    |      | (such as piloting forms, done independently, in duplicate), any                 |          |
| 24 | process            |      | processes for obtaining and confirming data from investigators                  |          |
| 25 |                    |      |                                                                                 |          |
| 26 |                    |      |                                                                                 |          |
| 27 | Data items         | #12  | List and define all variables for which data will be sought                     | 7        |
| 28 |                    |      | (such as PICO items, funding sources), any pre-planned data                     |          |
| 29 |                    |      | assumptions and simplifications                                                 |          |
| 30 |                    |      |                                                                                 |          |
| 31 |                    |      |                                                                                 |          |
| 32 |                    |      |                                                                                 |          |
| 33 | Outcomes and       | #13  | List and define all outcomes for which data will be sought,                     | 7        |
| 34 | prioritization     |      | including prioritization of main and additional outcomes, with                  |          |
| 35 |                    |      | rationale                                                                       |          |
| 36 |                    |      |                                                                                 |          |
| 37 |                    |      |                                                                                 |          |
| 38 | Risk of bias in    | #14  | Describe anticipated methods for assessing risk of bias of                      | See note |
| 39 | individual studies |      | individual studies, including whether this will be done at the                  | 1        |
| 40 |                    |      | outcome or study level, or both; state how this information will                |          |
| 41 |                    |      | be used in data synthesis                                                       |          |
| 42 |                    |      |                                                                                 |          |
| 43 |                    |      |                                                                                 |          |
| 44 |                    |      |                                                                                 |          |
| 45 | Data synthesis     | #15a | Describe criteria under which study data will be quantitatively                 | 8        |
| 46 |                    |      | synthesised                                                                     |          |
| 47 |                    |      |                                                                                 |          |
| 48 |                    |      |                                                                                 |          |
| 49 |                    | #15b | If data are appropriate for quantitative synthesis, describe                    | 8        |
| 50 |                    |      | planned summary measures, methods of handling data and                          |          |
| 51 |                    |      | methods of combining data from studies, including any                           |          |
| 52 |                    |      | planned exploration of consistency (such as I <sup>2</sup> , Kendall's $\tau$ ) |          |
| 53 |                    |      |                                                                                 |          |
| 54 |                    |      |                                                                                 |          |
| 55 |                    |      |                                                                                 |          |
| 56 |                    | #15c | Describe any proposed additional analyses (such as                              | 8        |
| 57 |                    |      | sensitivity or subgroup analyses, meta-regression)                              |          |
| 58 |                    |      |                                                                                 |          |
| 59 |                    |      |                                                                                 |          |
| 60 |                    |      |                                                                                 |          |

|    |               |      |                                                                 |          |
|----|---------------|------|-----------------------------------------------------------------|----------|
| 1  |               | #15d | If quantitative synthesis is not appropriate, describe the type | 8        |
| 2  |               |      | of summary planned                                              |          |
| 3  |               |      |                                                                 |          |
| 4  |               |      |                                                                 |          |
| 5  | Meta-bias(es) | #16  | Specify any planned assessment of meta-bias(es) (such as        | See note |
| 6  |               |      | publication bias across studies, selective reporting within     | 2        |
| 7  |               |      | studies)                                                        |          |
| 8  |               |      |                                                                 |          |
| 9  |               |      |                                                                 |          |
| 10 | Confidence in | #17  | Describe how the strength of the body of evidence will be       | See note |
| 11 | cumulative    |      | assessed (such as GRADE)                                        | 3        |
| 12 | evidence      |      |                                                                 |          |
| 13 |               |      |                                                                 |          |
| 14 |               |      |                                                                 |          |
| 15 |               |      |                                                                 |          |

## Author notes

1. NA for scoping review
2. NA for scoping reviews
3. NA for scoping reviews

The PRISMA-P checklist is distributed under the terms of the Creative Commons Attribution License CC-BY 4.0. This checklist was completed on 02. June 2018 using <http://www.goodreports.org/>, a tool made by the [EQUATOR Network](#) in collaboration with [Penelope.ai](#)

# BMJ Open

## Patient-Centered Care for Addictions Treatment: A Scoping Review Protocol

|                                 |                                                                                                                                                                                                                                                                                                                                                                                                                                                                                                                                                                                                                                                                                                                                                                                                  |
|---------------------------------|--------------------------------------------------------------------------------------------------------------------------------------------------------------------------------------------------------------------------------------------------------------------------------------------------------------------------------------------------------------------------------------------------------------------------------------------------------------------------------------------------------------------------------------------------------------------------------------------------------------------------------------------------------------------------------------------------------------------------------------------------------------------------------------------------|
| Journal:                        | <i>BMJ Open</i>                                                                                                                                                                                                                                                                                                                                                                                                                                                                                                                                                                                                                                                                                                                                                                                  |
| Manuscript ID                   | bmjopen-2018-024588.R1                                                                                                                                                                                                                                                                                                                                                                                                                                                                                                                                                                                                                                                                                                                                                                           |
| Article Type:                   | Protocol                                                                                                                                                                                                                                                                                                                                                                                                                                                                                                                                                                                                                                                                                                                                                                                         |
| Date Submitted by the Author:   | 03-Oct-2018                                                                                                                                                                                                                                                                                                                                                                                                                                                                                                                                                                                                                                                                                                                                                                                      |
| Complete List of Authors:       | Marchand, Kirsten; University of British Columbia, School of Population and Public Health; Centre for Health Evaluation and Outcome Sciences, Beaumont, Scott; University of British Columbia, School of Population and Public Health; Centre for Health Evaluation and Outcome Sciences, Westfall, Jordan; Canadian Association for People Who Use Drugs MacDonald, Scott; Providence Health Care, Crosstown Clinic Harrison, Scott; Providence Health Care, Crosstown Clinic Marsh, David; Northern Ontario School of Medicine, Schechter, Martin; University of British Columbia, SPPH; Centre for Health Evaluation and Outcome Sciences, Oviedo-Joekes, Eugenia; University of British Columbia, School of Population and Public Health; Centre for Health Evaluation and Outcome Sciences, |
| <b>Primary Subject Heading</b>: | Addiction                                                                                                                                                                                                                                                                                                                                                                                                                                                                                                                                                                                                                                                                                                                                                                                        |
| Secondary Subject Heading:      | Patient-centred medicine, Public health                                                                                                                                                                                                                                                                                                                                                                                                                                                                                                                                                                                                                                                                                                                                                          |
| Keywords:                       | Patient-centered care, Client-centered care, Substance-related disorders, Problematic substance use, Addiction treatment, person-centered care                                                                                                                                                                                                                                                                                                                                                                                                                                                                                                                                                                                                                                                   |
|                                 |                                                                                                                                                                                                                                                                                                                                                                                                                                                                                                                                                                                                                                                                                                                                                                                                  |

SCHOLARONE™  
Manuscripts

## Patient-Centered Care for Addictions Treatment: A Scoping Review Protocol

### Authors:

Kirsten Marchand<sup>1, 2</sup>

Scott Beaumont<sup>1</sup>

Jordan Westfall<sup>3</sup>

Scott MacDonald<sup>4</sup>

Scott Harrison<sup>4</sup>

David C. Marsh<sup>5</sup>

Martin T. Schechter<sup>1, 2</sup>

Eugenia Oviedo-Joekes<sup>1, 2</sup>

### Author affiliation and addresses:

1. School of Population and Public Health, University of British Columbia, 2206 East Mall, Vancouver, BC, V6T 1Z3, Canada.
2. Centre for Health Evaluation & Outcome Sciences, Providence Health Care, St. Paul's Hospital, 575- 1081 Burrard St., Vancouver, BC, V6Z 1Y6, Canada.
3. Canadian Association for People Who Use Drugs, 46 East Hastings St., Vancouver, BC V6A 1N1, Canada.
4. Providence Health Care, Providence Crosstown Clinic, 84 West Hastings St., Vancouver, BC V6B 1G6, Canada.
5. Northern Ontario School of Medicine, 935 Ramsey Lake Road, Sudbury, ON P3E 2C6, Canada.

### Corresponding Author:

Kirsten Marchand

575-1081 Burrard St., Vancouver, BC, V6Z 1Y6, Canada.

[kmarchand@cheos.ubc.ca](mailto:kmarchand@cheos.ubc.ca)

778-847-8715

**Word count** (excluding title page, abstract, references, figures and tables): 3,215

**Keywords:** Patient-centered care; client-centered care; person-centered care; addiction treatment; substance-related disorders; problematic substance use

## ABSTRACT:

**Introduction:** Substance use disorders are chronic conditions that require a multidimensional treatment approach. Despite ongoing efforts to diversify such treatments, evidence continues to illuminate modest rates of treatment engagement and perceived barriers to treatment. Patient-centered care (PCC) is one approach that may strengthen the responsiveness of treatments for people with problematic substance use. The aim of this scoping review is to explore how the principles of patient-centered care have been implemented and operationalized in health care settings for people with problematic substance use.

**Methods and analysis:** This scoping review follows the iterative stages of the Arksey and O'Malley framework. Both empirical (from Medline, Embase, PsycINFO, CINAHL and ISI Web of Science) and grey literature references will be considered if they focused on populations with problematic substance use and described or measured PCC or one of its principles in a health-oriented context. Two reviewers will independently screen references in two successive stages of title/abstract screening and then full-text screening for references meeting title/abstract criteria. A descriptive overview, tabular and/or graphical summaries, and a directed content analysis will be carried out on extracted data. This scoping review has been registered with Open Science Framework (<https://osf.io/5swvd/>).

**Ethics and dissemination:** This review will examine the nature and extent to which the principles of PCC have been implemented, defined, and measured. Such evidence will contribute to the operationalization of PCC for people with problematic substance use. A multidisciplinary team has been gathered to represent the needs of people with problematic substance use, health care providers, and decision makers. The team's knowledge users will be engaged throughout this review and will participate in dissemination activities (e.g., workshops, presentations, publications, reports).

### ARTICLE SUMMARY: (Strengths and Limitations of this Study)

- This is the first scoping review to systematically explore which principles of patient-centered care have been implemented and their operationalization among people with problematic substance use.
- A multidisciplinary team composed of drug policy advocates, health care providers, decision makers, and academics will lead this scoping review.
- Both the population (people with problematic substance use) and concept of interest (patient-centered care) have been indexed using a variety of terms, which poses a challenge to ensuring breadth of the search.
- A comprehensive search strategy has been developed in consultation with a health sciences librarian to promote a sensitive scope of empirical and grey literature sources.

- This iterative scoping review study has been registered with Open Science Framework to enhance its transparency (<https://osf.io/5swvd/>).

## 1. INTRODUCTION

Alcohol, tobacco, and illicit substance use continues to be a significant public health concern that accounts for 11.2% of the global burden of disease and 21.1% of all deaths.[1] People with substance use disorders are at an increased risk of mortality and morbidity;[2 3] and some may be further affected by lost family and social support, criminal justice involvement, and social marginalization.[4] However, not all people with problematic substance use follow the same trajectory. Instead, there are individual variations in the personal meaning of substance use, in the intensity and frequency of use, and its associated harms.[4-6] This heterogeneity in substance use disorders contributes to the complexity of its treatment.

It is increasingly accepted that there is no ‘one size fits all’ treatment approach for problematic substance use and that a range of treatments are required to meet the diverse needs and preferences of this population.[5 6] For example, effective pharmacological therapies are available to assist with the treatment of some, but not all, substance use disorders (e.g., tobacco, alcohol, opioid dependence).[7] Treatment may also include psychosocial interventions (e.g., cognitive behavioural therapy, contingency management, or strengths-based treatment) either in combination with pharmacological therapies or alone.[8 9] Regardless of the treatment provided, the main goal is to engage clients in care, since treatment engagement is widely recognized as one of the most important predictors of substance use outcomes.[10 11]

As such, tremendous efforts have been made towards improving client engagement. Examples include: diversified treatment settings that offer traditional residential and hospital-based programs, specialized outpatient programs, and more recently, integrated service models.[7 12] To increase the rate of detection and treatment engagement, opportunities for screening and brief intervention have also been incorporated and expanded outside of specialized substance use treatment programs.[13] Various problem-to-services matching designs have also been developed to increase successful treatment engagement by strengthening alignment between client’s needs and services offered.[14-17]

In spite of these important developments, research continues to demonstrate quite mixed uptake of these practices,[17] as well as varying rates of treatment engagement. [7 12] Globally, it is estimated that 1 out of every 6 people in need of substance use treatment is able to receive it; and this does not imply receipt of evidence- or human-rights based treatments.[18] Even when examining evidence-based treatments, such as opioid agonist treatment, recent systematic reviews suggest a wide range in the rate of treatment retention (e.g., from 37%–91% at 12-month follow-up).[19] There is also a substantial body of qualitative research that has revealed several areas in which clients (and in some cases providers) have perceived challenges with engaging in treatment. A few examples include perceived provider misunderstanding of treatment goals,[20] discrepancies between client and provider’s treatment goals,[21] a lack of treatment

1  
2  
3 responsiveness to client's perceived needs,[22 23] challenges with involving clients in treatment  
4 planning and delivery,[24] and perceived power imbalances, stigma and discrimination.[25-27]  
5 This evidence suggests that there remains a need to explore *how* treatment processes can be  
6 designed to increase client engagement better respond to client's unique needs, while also  
7 considering the diversity of treatments and settings required.  
8  
9

10 Patient-centered care (PCC) is one potential approach warranting further exploration. PCC is  
11 rooted in a philosophy that '*puts the person first*', endeavoring to meet their unique needs and  
12 preferences, enhancing their experiences with care, and involving them in all elements of  
13 treatment planning and delivery.[28] Some of its origins can be traced back to Carl Rogers'  
14 client-centered therapy, which emphasized unconditional positive regard, empathy, and  
15 genuineness in the therapeutic process.[29] Over the last two decades, as the concept of PCC has  
16 garnered increased attention across the health and social sciences[30 31], its operationalization  
17 has included a refinement and expansion of the role of the therapeutic relationship. For example,  
18 in nursing, empirically based conceptual frameworks[32-34] agree that PCC entails an approach  
19 to care that is holistic, individualized, respectful, and empowering. In medicine, the proposed  
20 frameworks converge around similar, but slightly reframed dimensions. Here, emphasis is on a  
21 biopsychosocial perspective, seeing the 'patient-as-person', enhancing the therapeutic alliance,  
22 and sharing power and responsibility.[35-40] These differences across disciplines (in the  
23 conceptual meaning of PCC) have resulted in varying operationalizations.  
24  
25  
26  
27  
28

29 That the meaning of PCC is currently somewhat context-specific poses challenges to determining  
30 the relationship between PCC and treatment process and outcome indicators. For example, a  
31 recent meta-analysis showed mixed effects of PCC (defined as shared control or decisions and/or  
32 consultations focused on whole person) on improved quality of care, treatment satisfaction and  
33 health outcomes.[41] It also found support for generally positive effects of PCC on consultation  
34 process measures (e.g., communication about treatments; levels of empathy),[41] suggesting that  
35 these approaches might overcome some of the challenges clients have historically experienced  
36 engaging in substance use treatment.  
37  
38  
39

40 It is important to recognize that elements of PCC have been recommended or defined as part of  
41 some addiction treatment approaches.[6] For example, principles of respect, empathy, or  
42 empowerment are integral to some treatments (e.g., motivational interviewing, strengths-based  
43 treatment). However, to our knowledge, it is not known to what extent each of the dimensions of  
44 PCC have been purposefully implemented or tested across the spectrum of treatment approaches  
45 for people with problematic substance use. Bringing this evidence together in a systematic  
46 scoping review has the potential to identify cross-setting, discipline and population dimensions  
47 of PCC that have been defined, implemented and empirically explored.  
48  
49  
50

## 51 **2. OBJECTIVE**

52  
53 The present scoping review will systematically explore how the principles of patient-centered  
54 care have been implemented and operationalized in health care settings for people with  
55  
56  
57  
58

1  
2  
3 problematic substance use. Specifically, this review aims to examine the extent and nature of  
4 existing evidence of PCC in addiction research and clinical practice.  
5

### 6 7 **3. METHODS AND ANALYSIS**

8 This scoping review methodology will apply the classic framework developed by Arksey and  
9 O'Malley,[42][36] and recent enhancements[43-45] including best practices for conducting and  
10 reporting systematic reviews (i.e., Preferred Reporting Items for Systematic Review and Meta-  
11 Analysis for Protocols and Scoping Reviews (PRISMA-P and PRISMA-ScR; Supplement 1).[46  
12 47] Accordingly, a reflexive and iterative approach will be maintained; particularly during the  
13 study screening and data extraction phases, which may become more refined throughout the  
14 review. The protocol has been registered through Open Science Framework  
15 (<https://osf.io/5swvd/>).[48] DistillerSR software for systematic reviews[49] will be used by both  
16 reviewers for screening, extraction, monitoring, and to support synthesis and summarizing of  
17 findings.  
18  
19  
20  
21

#### 22 **3.1. Stage 1: Defining the Research Question**

23 The research question was developed as a broad framing of the population (i.e., people with  
24 problematic substance use), the concept (i.e., patient-centered care) and the context (i.e., health-  
25 oriented settings) to be explored. Thus, this scoping review asks:  
26  
27

- 28 1. Which patient-centered care principles have been implemented in health-oriented  
29 settings for people with problematic substance use?  
30
- 31 2. How have these patient-centered care principles been operationalized when used in  
32 health-oriented settings for people with problematic substance use?  
33
- 34 3. What outcomes from the implementation of patient-centered care principles have been  
35 empirically measured or tested?  
36

#### 37 **3.2. Stage 2: Identifying Relevant Literature**

38 Our goal in developing this search strategy (Supplement 2) is to undertake a comprehensive  
39 review of the existing evidence base. However, this particular research question poses a  
40 challenge to keyword selection due to the evolution of terms used to describe both the population  
41 and concept of interest. For instance, problematic substance use has grown from the pejorative  
42 language of the 'addict' to a health-oriented view of 'substance dependent populations' and now  
43 onto the more person-focused discourse of 'people with problematic substance use'.[50 51]  
44  
45  
46  
47

48 Likewise, as described above, conceptual frameworks of PCC have varied, adding to the  
49 complexity of this search. To overcome this challenge, we have developed a search strategy  
50 informed by the principles of PCC that have been most consistently (in the previously mentioned  
51 frameworks) identified and operationalized, as well as keywords and MeSH terms from  
52 systematic reviews[52 53] and empirical references[54-56] previously conducted among our  
53 population of interest: (1) *understanding the whole person* to account for the biological,  
54 psychological and social aspects of patients' illnesses; (2) *exploring the disease and illness*  
55  
56  
57  
58

1  
2  
3 *experience* to understand the personal meaning of illness and treatment for the patient; (3)  
4 *finding common ground* where power, knowledge and responsibility are shared between the  
5 patient and provider; and (4) *enhancing the patient-provider relationship* to improve the positive  
6 outcomes of treatments provided. We have also engaged in an extensive consultation process  
7 with an experienced Health Science Librarian (at the University of British Columbia) as well as  
8 the knowledge users represented in our team (authors SM and SH). The search strategy will also  
9 be peer reviewed (i.e., PRESS) to promote its rigor and feasibility.[57]

10  
11  
12  
13 Given our interest in undertaking a comprehensive review of existing research and clinical  
14 guidelines related to PCC in the addictions field, both empirical (primary studies, previous  
15 reviews) and grey literature documents (conference abstracts, reports, and clinical guidelines)  
16 will be included in our search. The search for empirical sources will be conducted in the most  
17 important electronic databases for the medical and social sciences: Medline (Ovid), Embase  
18 (Ovid), PsycINFO, CINAHL, and ISI Web of Science. The search strategy has been developed  
19 in Medline (Ovid) and will be adapted to the other databases. The search strategy will include  
20 subject headings, related terms, and keywords as necessary for the research question. Boolean  
21 logic and operators (i.e., ‘and’, ‘or’, ‘not’) will be used to combine and refine search terms and  
22 concepts.  
23

24  
25  
26 For the grey literature search strategy, we will utilize recommended resources[58] and consult  
27 with the Health Sciences Librarian and our team’s knowledge users to devise a database specific  
28 approach. The search for abstracts, reports, and clinical guidelines will be carried out in several  
29 Canadian-specific databases: British Columbia Guidelines and Protocols Databases, CPG  
30 Infobase, the Registered Nurses’ Association Clinical Practice Guidelines Program, and Des  
31 Libris. For international grey literature documents, we will search National Guideline  
32 Clearinghouse, TRIP, Google, and Google Scholar databases.  
33

### 36 37 **3.3. Stage 3: Study Selection**

38 A two-stage collaborative review process will be used to select references. Eligibility criteria  
39 have been developed *a priori*, in consultation with the study team. The screening form will be  
40 piloted on the first 20 citations of the initial Medline (Ovid) search to test both the criteria and  
41 reviewer agreement. Two independent reviewers (authors KM and SB) will apply eligibility  
42 criteria during the initial title/abstract review. After each review stage, the reviewer’s agreement  
43 will be assessed and a third reviewer (author EOJ) will be consulted in cases of disagreement,  
44 until consensus is achieved.  
45

46  
47  
48 A title/abstract (or executive summary for reports and guidelines) will be eligible for full text  
49 screening if it:  
50

51 a) Refers to people with problematic substance use (including tobacco, alcohol, cannabis,  
52 stimulant, opioid use, or dual diagnoses);  
53  
54  
55  
56  
57  
58

b) Is about delivering patient-centered care or one of its principles (including care that understands the whole person; explores the disease and illness experience; finds common ground and enhances the patient-provider relationship);

c) Is set in a health-oriented context (including inpatient or outpatient hospital settings, emergency departments, community-based or primary care health settings, and any specialized drug treatment or low-threshold agencies and programs; excluding prison-based health programs and self-help models such as narcotics or alcoholics anonymous); and

d) Was published between January 1, 1960 and July 1, 2018 in English, French, Spanish, Italian, Portuguese or German.

Full text empirical articles, reports and guidelines will then be obtained for titles/abstracts meeting these above criteria and will undergo further screening. In addition to the title/abstract criteria, full texts will be included if:

e) It provided an operational definition of the patient-centered care framework that was delivered to people with problematic substance use in the health-oriented context; and

f) It observed at least one outcome (e.g., treatment compliance, treatment satisfaction) of the patient-centered treatment approach (this criterion pertains to empirical articles only).

As such, articles that provide only a recommendation to adopt PCC or an opinion of how PCC should be implemented in health-oriented settings for people with problematic substance use will not be included.

### 3.4. Stage 4: Data Extraction

Results of the search will be collated in DistillerSR,[49] allowing the research team to de-duplicate and perform data extraction. We will follow recommended data charting methods[42 47] to systematically capture relevant details for studies/reports and guidelines (Table 1). Data charting forms will be piloted with the first 5 empirical and grey literature references and may be adapted thereafter (with input from the teams' knowledge users).

**Table 1. Data extraction and charting for empirical and grey literature sources**

| Domain/Subdomain                                     | Description                                                                     |
|------------------------------------------------------|---------------------------------------------------------------------------------|
| <b>1. General Document Details</b>                   |                                                                                 |
| 1.1 Reference Type                                   | Empirical study, case study, review, commentary, report, guideline              |
| 1.2 Publication Year                                 | Year of publication                                                             |
| 1.3 Country and Location                             | Country of publication (and location if provided)                               |
| 1.4 Publication Language                             | Language of publication                                                         |
| <b>2. Empirical Study References (if applicable)</b> |                                                                                 |
| 2.1 Research objective                               | What was the research objective or specific question to be tested (if relevant) |

|                                                      |                                                                                                                                                                                                                                                    |
|------------------------------------------------------|----------------------------------------------------------------------------------------------------------------------------------------------------------------------------------------------------------------------------------------------------|
| 2.2 Study design                                     | Was the study design observational, experimental, or qualitative?                                                                                                                                                                                  |
| 2.3 Study population                                 | What were the eligibility criteria? Would the population be classified as primarily: tobacco, cannabis, alcohol, opioid, stimulant, or comorbid substance use and mental illness?                                                                  |
| 2.4 Patient-centered care intervention               | What was the operational definition of patient-centered care used (including the definition of specific principles, if available)? How long was the intervention provided or observed for?                                                         |
| 2.5 Context/setting                                  | What health-oriented context was the PCC intervention apart of? What health professionals were involved?                                                                                                                                           |
| 2.6 Study outcomes                                   | For quantitative studies, what were the primary and secondary outcomes measured? For qualitative studies, what outcomes were described?                                                                                                            |
| 2.7 Important results                                | What were the main results of the study? Were there any important sub-group (e.g., by sex and gender, by primary substance, by health care provider) analyses?                                                                                     |
| 2.8 Limitations                                      | What limitations did the authors describe? What others might there be?                                                                                                                                                                             |
| <b>3. Grey Literature References (if applicable)</b> |                                                                                                                                                                                                                                                    |
| 3.1 Target audience                                  | Is there a target audience specified for the guideline/report (e.g., policy/decision maker, health care provider, patient/client/family)?                                                                                                          |
| 3.2 Reference population                             | If available, how was the target patient population defined? Any specific eligibility criteria used? Would the population be classified as primarily: tobacco, cannabis, alcohol, opioid, stimulant, or comorbid substance use and mental illness? |
| 3.3 Patient-centered care operational definition     | What was the operational definition of patient-centered care used (including the definition of specific principles, if available)?                                                                                                                 |
| 3.4 Context/setting                                  | What health-oriented context was the PCC intervention apart of? What health professionals were involved?                                                                                                                                           |
| 3.5 Intervention and outcomes                        | If applicable, was a specific patient-centered intervention described (e.g., a training module, a clinical approach)? Were any outcomes of PCC reported (e.g., patient or provider satisfaction)?                                                  |
| 3.6 Program evaluation                               | If available, what results were reported from any ongoing program evaluations?                                                                                                                                                                     |

### 3.5. Stage 5: Collating, Summarizing and Reporting the Results

We will present a descriptive overview (including tabular and/or graphical summaries) of the eligible full texts.[42] We will also summarize studies by each broader category of substances primarily used (i.e., tobacco, cannabis, alcohol, opioid, stimulant, dual diagnosis). Displaying information in this way will highlight population-specific similarities and differences in PCC, its

1  
2  
3 definition and outcomes. This will facilitate the identification of future directions for research  
4 and practice. All tables and charts will include narrative summaries, relating the findings to the  
5 review's research question. Additionally, we will develop a final report of the review[47]  
6 according to PRISMA-ScR guidelines.[46]  
7  
8

9 Given that one aim of this review is to understand *how* PCC has been defined and implemented  
10 in health care services for people with problematic substance use, a directed content analysis will  
11 be carried out on included guidelines. This approach has been deemed most suitable to the  
12 present review, since it allows existing theory (in our case, principles of PCC defined a priori to  
13 guide the coding and analysis), while still allowing new evidence to emerge.[59] Specifically, we  
14 are interested in qualitatively analyzing the definition of PCC adopted in the guidelines, how it  
15 was developed, which health care providers were involved, and any outcomes or ongoing  
16 evaluations of the program. To do so, data from the guidelines will be imported to MAXQDA,  
17 version 12,[60] a qualitative analysis software program that supports a multi-user approach. This  
18 analysis will be conducted by authors KM, SB, and EOJ, who have prior experience conducting  
19 thematic analysis on similar topics.[61 62] As is common in directed content qualitative  
20 analysis,[59] a coding framework will be developed a priori, and will then be applied by authors  
21 KM and SB independently. Results from this analysis will be summarized and—where  
22 relevant—numerical summaries may also be used to provide additional context to the themes  
23 (e.g., number of clients treated, number of staff).  
24  
25  
26  
27  
28

### 29 **3.6. Stage 6: Consultation Process and Engagement of Knowledge Users**

30  
31 The ultimate aim of this review is to generate evidence that can be used to inform decision-  
32 makers and health care providers on the feasibility, implications, and potential outcomes  
33 associated with PCC for substance use treatment. To achieve this goal, we have engaged a multi-  
34 disciplinary team of knowledge users who represent the needs of: people with problematic  
35 substance use, health care providers, and decision makers. Consulting with the teams' health care  
36 providers and decision-makers (authors SH, SM, and DCM) will promote a methodology that  
37 reflects the realities of patient-provider roles and the health care system's organization. Also, our  
38 team's drug policy knowledge user (author JW) represents a national organization of people who  
39 use drugs and this critical perspective will ensure that all aspects of this review are rooted in the  
40 client-centered needs of this diverse population. The specific contributions of the Knowledge  
41 Users to each stage of this review have been defined throughout. At this time, Knowledge Users  
42 have reviewed early drafts of the search strategy, identifying additional terms that are important  
43 for inclusion given the population, concept, and contexts of interest (e.g., trauma-informed care  
44 and culturally-safe care). Knowledge Users have also provided several grey-literature references  
45 (clinical guidelines and reports) to be considered for inclusion. As the project continues to  
46 evolve, all Knowledge Users will be involved in supporting the interpretation of findings and  
47 their dissemination.  
48  
49  
50  
51  
52  
53

## 54 **4. ETHICS AND DISSEMINATION**

1  
2  
3 As substance use disorders are increasingly recognized as a chronic conditions often marked by  
4 cycles of relapse and recovery, the public health care system is considering how existing  
5 treatment and intervention approaches can be optimized to meet the long-term and evolving  
6 goals of clients.[18] Adopting patient- or person-centered approaches may increase the  
7 responsiveness of existing treatments to individual client needs, expectations, and preferences.  
8 To our knowledge, this review will be the first to systematically examine the extent and nature of  
9 existing evidence of PCC in addiction research and clinical practice.  
10  
11  
12

13 Our dissemination strategy will utilize traditional approaches, including open-access peer-  
14 reviewed publication(s), scientific presentations, and a report. Additionally, we are committed to  
15 promoting further action based on the potential findings of this review. Therefore, we will host a  
16 half-day roundtable meeting—bringing together people with problematic substance use, health  
17 care providers (from diverse settings), and decision-makers to brainstorm potential opportunities  
18 for future areas of research and clinical practice work. For example, we may engage in a concept  
19 mapping exercise, using the findings of this review to integrate stakeholders' knowledge,  
20 interpretations, and priorities into practice. The multidisciplinary nature of this team will  
21 facilitate and support our goal of bringing together these different representatives together.  
22  
23  
24

## 25 **5. PATIENT AND PUBLIC INVOLVEMENT**

26  
27 This scoping review protocol has engaged the expertise of a national organization of people who  
28 use(d) drugs through the involvement of this organizations' President. This knowledge user  
29 (author JW) has made contributions to the development of the research question and will also be  
30 extensively involved during the interpretation and dissemination phases of this project.  
31  
32  
33  
34

### 35 **AUTHOR CONTRIBUTIONS:**

36 KM (review guarantor) led the design and conceptualisation of this review and drafted the  
37 protocol with primary support from SB, MTS, and EOJ. SB, SH, and EOJ were involved in  
38 refining the search strategy, including key words. SM, SH, DCM, and JW were involved in  
39 establishing eligibility criteria and data extraction forms. All authors provided feedback on the  
40 manuscript and approval to the publishing of this protocol manuscript.  
41  
42  
43  
44

45 **AMENDMENTS:** Not applicable  
46

47 **SUPPORT (SOURCES, SPONSOR, ROLE OF SPONSOR OR FUNDER):** Funding for this  
48 scoping review has been provided by the Canadian Institutes of Health Research (Operating  
49 Grant: Opioid Crisis Knowledge Synthesis). We would also like to acknowledge Ursula Ellis,  
50 Health Sciences Librarian (University of British Columbia), who has provided invaluable  
51 expertise to the development and refinement of the search strategy of this scoping review.  
52  
53  
54

55 **COMPETING INTERESTS:** The authors have no competing interests to declare.  
56  
57  
58

## References

1. Gakidou E, Afshin A, Abajobir AA, et al. Global, regional, and national comparative risk assessment of 84 behavioural, environmental and occupational, and metabolic risks or clusters of risks, 1990-2016: A systematic analysis for the Global Burden of Disease Study 2016. *The Lancet* 2017;390(10100):1345-422. doi: 10.1016/S0140-6736(17)32366-8
2. Holford TR, Meza R, Warner KE, et al. Tobacco control and the reduction in smoking-related premature deaths in the united states, 1964-2012. *JAMA* 2014;311(2):164-71. doi: 10.1001/jama.2013.285112
3. Whiteford HA, Degenhardt L, Rehm J, et al. Global burden of disease attributable to mental and substance use disorders: findings from the Global Burden of Disease Study 2010. *Lancet* 2013;382(9904):1575-86. doi: 10.1016/s0140-6736(13)61611-6 [published Online First: 2013/09/03]
4. Nutt DJ, King LA, Phillips LD. Drug harms in the UK: a multicriteria decision analysis. *Lancet* 2010;376(9752):1558-65. doi: [http://dx.doi.org/10.1016/S0140-6736\(10\)61462-6](http://dx.doi.org/10.1016/S0140-6736(10)61462-6)
5. Hammer G. Trust and relationship as cornerstones of successful psychotherapy. In: Tatarsky A, Tatarsky A, eds. *Harm reduction psychotherapy: A new treatment for drug and alcohol problems*. Lanham, MD, US: Jason Aronson 2002:106-35.
6. Abou-Saleh MT, Tarter RE, Salloum IM. Substance use disorders. In: Mezzich JE, Botbol M, Christodoulou GN, et al., eds. *Person centered psychiatry*. Cham, Switzerland: Springer International Publishing 2016:325-43.
7. Substance Abuse and Mental Health Services Administration. Chapter 4, Early Intervention, Treatment, And Management of Substance Use Disorders. In: Office of the Surgeon General (US), ed. *Facing Addiction in America: The Surgeon General's Report on Alcohol, Drugs, and Health*. Washington (DC), 2016.
8. Jhanjee S. Evidence Based Psychosocial Interventions in Substance Use. *Indian Journal of Psychological Medicine* 2014;36(2):112-18. doi: 10.4103/0253-7176.130960
9. Magill M, Ray LA. Cognitive-Behavioral Treatment With Adult Alcohol and Illicit Drug Users: A Meta-Analysis of Randomized Controlled Trials. *Journal of Studies on Alcohol and Drugs* 2009;70(4):516-27. doi: 10.15288/jsad.2009.70.516
10. Hubbard RL, Craddock SG, Flynn PM, et al. Overview of One-Year Follow-Up Outcomes in the Drug Abuse Treatment Outcome Study (DATOS). *Psychology of Addictive Behaviors* 1997;11(4 special issue):261-78.
11. Simpson DD, Joe GW, Rowan-Szal GA. Drug abuse treatment retention and process effects on follow-up outcomes. *Drug Alcohol Depend* 1997;47(3):227-35.
12. Substance Abuse and Mental Health Services Administration. Chapter 6, Health Care Systems and Substance Use Disorders. In: US Department of Health and Human Services,

- 1  
2  
3 ed. Facing Addiction in America: The Surgeon General's Report on Alcohol, Drugs, and  
4 Health Washington (DC)2016.  
5  
6 13. Babor TF, McRee BG, Kassebaum PA, et al. Screening, Brief Intervention, and Referral to  
7 Treatment (SBIRT). *Substance Abuse* 2007;28(3):7-30. doi: 10.1300/J465v28n03\_03  
8  
9 14. Marsh JC, Cao D, Shin HC. Closing the Need-Service Gap: Gender Differences in Matching  
10 Services to Client Needs in Comprehensive Substance Abuse Treatment. *Social work*  
11 *research* 2009;33(3):183-92. [published Online First: 2009/09/01]  
12  
13 15. Hser YI, Polinsky ML, Maglione M, et al. Matching clients' needs with drug treatment  
14 services. *J Subst Abuse Treat* 1999;16(4):299-305. [published Online First: 1999/06/01]  
15  
16 16. Group PMR. Matching patients with alcohol disorders to treatments: Clinical  
17 implications from Project MATCH. *Journal of Mental Health* 1998;7(6):589-602. doi:  
18 10.1080/09638239817743  
19  
20 17. Alexander JA, Nahra TA, Lemak CH, et al. Tailored treatment in the outpatient substance  
21 abuse treatment sector: 1995-2005. *Journal of Substance Abuse Treatment* 2008;34(3):282-  
22 92.  
23  
24 18. United Nations Office on Drugs and Crime. International Standards for the Treatment of  
25 Drug Use Disorders. Geneva: World Health Organization, 2017.  
26  
27 19. Timko C, Schultz NR, Cucciare MA, et al. Retention in medication-assisted treatment for  
28 opiate dependence: A systematic review. *J Addict Dis* 2016;35(1):22-35. doi:  
29 10.1080/10550887.2016.1100960 [published Online First: 2015/10/16]  
30  
31 20. Rance J, Treloar C. "We are people too": consumer participation and the potential  
32 transformation of therapeutic relations within drug treatment. *International Journal of*  
33 *Drug Policy* 2015;26(1):30-36. doi: 10.1016/j.drugpo.2014.05.002  
34  
35 21. Joosten EAG, De Weert-Van Oene GH, Sensky T, et al. Treatment goals in addiction  
36 healthcare: The perspectives of patients and clinicians. *International Journal of Social*  
37 *Psychiatry* 2011;57(3):263-76. doi: 10.1177/0020764009354835  
38  
39 22. McNeil R, Kerr T, Pauly B, et al. Advancing patient-centered care for structurally  
40 vulnerable drug-using populations: A qualitative study of the perspectives of people who  
41 use drugs regarding the potential integration of harm reduction interventions into  
42 hospitals. *Addiction* 2016;111(4):685-94. doi: 10.1111/add.13214  
43  
44 23. Pauly B, McCall J, Browne AJ, et al. Toward cultural safety: Nurse and patient  
45 perceptions of illicit substance use in a hospitalized setting. *Advances in Nursing Science*  
46 2015;38(2):121-35. doi: 10.1097/ANS.0000000000000070  
47  
48 24. Bryant J, Bryant J, Saxton M, et al. Consumers' and providers' perspectives about  
49 consumer participation in drug treatment services: is there support to do more? What are  
50 the obstacles? *Drug and Alcohol Review* 2008;27(2):138-44. doi:  
51 10.1080/09595230701829405  
52  
53 25. Fischer J, Neale J. Involving drug users in treatment decisions: An exploration of  
54 potential problems. *Drugs: Education, Prevention & Policy* 2008;15(2):161-75. doi:  
55 10.1080/09687630701391604  
56  
57  
58

26. Strike C, Rufo C. Embarrassing, degrading, or beneficial: patient and staff perspectives on urine drug testing in methadone maintenance treatment. *Journal of Substance Use* 2010;15(5):303-12. doi: 10.3109/14659890903431603
27. Palis H, Marchand K, Peng D, et al. Factors Associated with Perceived Abuse in the Health Care System Among Long-Term Opioid Users: A Cross-Sectional Study. *Subst Use Misuse* 2016;51(6):763-76. doi: 10.3109/10826084.2016.1155605 [published Online First: 2016/04/21]
28. Berwick DM. What 'patient-centered' should mean: confessions of an extremist. *Health Aff (Millwood)* 2009;28(4):w555-65. doi: 10.1377/hlthaff.28.4.w555 [published Online First: 2009/05/21]
29. Rogers C. *On Becoming a Person. A Therapist's View of Psychotherapy*. Boston: Houghton Mifflin Company 1961.
30. Institute of Medicine (IOM). *Crossing the Quality Chasm: A New Health System for the 21st Century*. 2001.
31. Beaulieu MD. President's message: toward a patient-centred health care system. *Can Fam Physician* 2013;59(1):109,10. [published Online First: 2013/01/24]
32. Slater L. Person-centredness: a concept analysis. *Contemp Nurse* 2006;23(1):135-44. doi: 10.5555/conu.2006.23.1.135 [published Online First: 2006/11/07]
33. Hobbs JL. A dimensional analysis of patient-centered care. *Nurs Res* 2009;58(1):52-62. doi: 10.1097/NNR.0b013e31818c3e79 [published Online First: 2008/12/19]
34. Morgan S, Yoder LH. A concept analysis of person-centered care. *J Holist Nurs* 2012;30(1):6-15. doi: 10.1177/0898010111412189 [published Online First: 2011/07/21]
35. Mead N, Bower P. Patient-centredness: a conceptual framework and review of the empirical literature. *Soc Sci Med* 2000;51(7):1087-110. [published Online First: 2000/09/27]
36. Stewart M. Towards a global definition of patient centred care. *BMJ* 2001;322(7284):444-5. [published Online First: 2001/02/27]
37. Robinson JH, Callister LC, Berry JA, et al. Patient-centered care and adherence: definitions and applications to improve outcomes. *J Am Acad Nurse Pract* 2008;20(12):600-7. doi: 10.1111/j.1745-7599.2008.00360.x [published Online First: 2009/01/06]
38. McMillan SS, Kendall E, Sav A, et al. Patient-centered approaches to health care: a systematic review of randomized controlled trials. *Medical care research and review : MCRR* 2013;70(6):567-96. doi: 10.1177/1077558713496318 [published Online First: 2013/07/31]
39. Scholl I, Zill JM, Harter M, et al. An integrative model of patient-centeredness - a systematic review and concept analysis. *PLoS One* 2014;9(9):e107828. doi: 10.1371/journal.pone.0107828 [published Online First: 2014/09/18]
40. Santana MJ, Manalili K, Jolley RJ, et al. How to practice person-centred care: A conceptual framework. *Health Expectations : An International Journal of Public Participation in Health Care and Health Policy* 2018;21(2):429-40. doi: 10.1111/hex.12640

- 1  
2  
3  
4  
5  
6  
7  
8  
9  
10  
11  
12  
13  
14  
15  
16  
17  
18  
19  
20  
21  
22  
23  
24  
25  
26  
27  
28  
29  
30  
31  
32  
33  
34  
35  
36  
37  
38  
39  
40  
41  
42  
43  
44  
45  
46  
47  
48  
49  
50  
51  
52  
53  
54  
55  
56  
57  
58  
59
41. Dwamena F, Holmes-Rovner M, Gaulden CM, et al. Interventions for providers to promote a patient-centred approach in clinical consultations. *Cochrane Database Syst Rev* 2012;12:Cd003267. doi: 10.1002/14651858.CD003267.pub2 [published Online First: 2012/12/14]
  42. Arksey H, O'Malley L. Scoping studies: towards a methodological framework. *International Journal of Social Research Methodology* 2005;8(1):19-32. doi: 10.1080/1364557032000119616
  43. Levac D, Colquhoun H, O'Brien KK. Scoping studies: advancing the methodology. *Implementation Science* 2010;5(1):69. doi: 10.1186/1748-5908-5-69
  44. Daudt HM, van Mossel C, Scott SJ. Enhancing the scoping study methodology: a large, inter-professional team's experience with Arksey and O'Malley's framework. *BMC Medical Research Methodology* 2013;13(1):48. doi: 10.1186/1471-2288-13-48
  45. Colquhoun HL, Levac D, O'Brien KK, et al. Scoping reviews: time for clarity in definition, methods, and reporting. *J Clin Epidemiol* 2014;67(12):1291-4. doi: 10.1016/j.jclinepi.2014.03.013 [published Online First: 2014/07/19]
  46. Tricco AC, Lillie E, Zarin W, et al. Prisma extension for scoping reviews (PRISMA-ScR): Checklist and explanation. *Annals of Internal Medicine* 2018 doi: 10.7326/M18-0850
  47. Joanna Briggs Institute. The Joanna Briggs Institute Reviewers' Manual 2015: Methodology for JBI Scoping Reviews. Australia, 2015.
  48. Center for Open Science. Open Science Framework Charlottesville, VA2011 [cited 2018. Available from: <https://osf.io> accessed 07-MAY-2018.
  49. DistillerSR: Systematic Review and Literature Review Software [program]. Ottawa, Canada: Evidence Partners, 2016.
  50. Kelly JF, Saitz R, Wakeman S. Language, Substance Use Disorders, and Policy: The Need to Reach Consensus on an "Addiction-ary". *Alcoholism Treatment Quarterly* 2016;34(1):116-23. doi: 10.1080/07347324.2016.1113103
  51. Broyles LM, Binswanger IA, Jenkins JA, et al. Confronting inadvertent stigma and pejorative language in addiction scholarship: a recognition and response. *Subst Abuse* 2014;35(3):217-21. doi: 10.1080/08897077.2014.930372 [published Online First: 2014/06/10]
  52. Barrio P, Gual A. Patient-centered care interventions for the management of alcohol use disorders: a systematic review of randomized controlled trials. *Patient Prefer Adherence* 2016;10:1823-45. doi: 10.2147/ppa.s109641 [published Online First: 2016/10/04]
  53. Friedrichs A, Spies M, Härter M, et al. Patient preferences and Shared Decision Making in the treatment of substance use disorders: A systematic review of the literature. *PLoS ONE* 2016;11(1)
  54. Schwartz RP, Kelly SM, Mitchell SG, et al. Patient-centered methadone treatment: a randomized clinical trial. *Addiction* 2017;112(3):454-64. doi: 10.1111/add.13622

- 1  
2  
3 55. Joosten E, de Weert G, Sensky T, et al. Effect of shared decision-making on therapeutic  
4 alliance in addiction health care. *Patient Prefer Adherence* 2008;2:277-85. [published  
5 Online First: 2008/01/01]  
6
- 7 56. Joosten EAG, De Weert-Van Oene GH, Sensky T, et al. Treatment Goals in Addiction  
8 Healthcare: the Perspectives of Patients and Clinicians. *International Journal of Social*  
9 *Psychiatry* 2010;57(3):263-76. doi: 10.1177/0020764009354835  
10
- 11 57. McGowan J, Sampson M, Salzwedel DM, et al. PRESS Peer Review of Electronic Search  
12 Strategies: 2015 Guideline Statement. *J Clin Epidemiol* 2016;75:40-6. doi:  
13 10.1016/j.jclinepi.2016.01.021 [published Online First: 2016/03/24]  
14
- 15 58. Canadian Agency for Drugs and Technologies in Health. Grey Matters: a practical tool  
16 for searching health-related grey literature. 2015 [Available from:  
17 <https://www.cadth.ca/resources/finding-evidence/grey-matters> accessed November 22,  
18 2017.  
19
- 20 59. Hsieh H-F, Shannon SE. Three Approaches to Qualitative Content Analysis. *Qualitative*  
21 *Health Research* 2005;15(9):1277-88. doi: 10.1177/1049732305276687  
22
- 23 60. MAXQDA. Qualitative Analysis Software [program], 2015.  
24
- 25 61. Oviedo-Joekes E, Marchand K, Palis H, et al. Predictors of treatment allocation guesses  
26 in a randomized controlled trial testing double-blind injectable hydromorphone and  
27 diacetylmorphine for severe opioid use disorder. *Addiction Research & Theory*  
28 2017;25(4):263-72. doi: 10.1080/16066359.2016.1263729  
29
- 30 62. Oviedo-Joekes E, Marchand K, Lock K, et al. A chance to stop and breathe: participants'  
31 experiences in the North American Opiate Medication Initiative clinical trial. *Addiction*  
32 *science & clinical practice* 2014;9:21-31. doi: 10.1186/1940-0640-9-21 [published Online  
33 First: 2014/09/30]  
34  
35  
36  
37  
38  
39  
40  
41  
42  
43  
44  
45  
46  
47  
48  
49  
50  
51  
52  
53  
54  
55  
56  
57  
58  
59  
60

# PRISMA-P Checklist

|                           |     | Reporting Item                                                                                                                                                                                  | Page Number |
|---------------------------|-----|-------------------------------------------------------------------------------------------------------------------------------------------------------------------------------------------------|-------------|
| Identification            | #1a | Identify the report as a protocol of a systematic review                                                                                                                                        | 1           |
| Update                    | #1b | If the protocol is for an update of a previous systematic review, identify as such                                                                                                              | NA          |
|                           | #2  | If registered, provide the name of the registry (such as PROSPERO) and registration number                                                                                                      | 2           |
| Contact                   | #3a | Provide name, institutional affiliation, e-mail address of all protocol authors; provide physical mailing address of corresponding author                                                       | 1           |
| Contribution              | #3b | Describe contributions of protocol authors and identify the guarantor of the review                                                                                                             | 10          |
|                           | #4  | If the protocol represents an amendment of a previously completed or published protocol, identify as such and list changes; otherwise, state plan for documenting important protocol amendments | NA          |
| Sources                   | #5a | Indicate sources of financial or other support for the review                                                                                                                                   | 10          |
| Sponsor                   | #5b | Provide name for the review funder and / or sponsor                                                                                                                                             | 10          |
| Role of sponsor or funder | #5c | Describe roles of funder(s), sponsor(s), and / or institution(s), if any, in developing the protocol                                                                                            | 10          |
| Rationale                 | #6  | Describe the rationale for the review in the context of what is already known                                                                                                                   | 3-4         |
| Objectives                | #7  | Provide an explicit statement of the question(s) the review will address with reference to participants, interventions, comparators, and outcomes (PICO)                                        | 4-5         |
| Eligibility criteria      | #8  | Specify the study characteristics (such as PICO, study design, setting, time frame) and report characteristics (such as years considered, language, publication status) to be                   | 6-7         |

used as criteria for eligibility for the review

|    |                    |      |                                                                 |            |
|----|--------------------|------|-----------------------------------------------------------------|------------|
| 1  |                    |      |                                                                 |            |
| 2  |                    |      |                                                                 |            |
| 3  | Information        | #9   | Describe all intended information sources (such as              | 5-6        |
| 4  | sources            |      | electronic databases, contact with study authors, trial         |            |
| 5  |                    |      | registers or other grey literature sources) with planned        |            |
| 6  |                    |      | dates of coverage                                               |            |
| 7  |                    |      |                                                                 |            |
| 8  |                    |      |                                                                 |            |
| 9  |                    |      |                                                                 |            |
| 10 | Search strategy    | #10  | Present draft of search strategy to be used for at least one    | Supplement |
| 11 |                    |      | electronic database, including planned limits, such that it     | 2          |
| 12 |                    |      | could be repeated                                               |            |
| 13 |                    |      |                                                                 |            |
| 14 |                    |      |                                                                 |            |
| 15 | Study records -    | #11a | Describe the mechanism(s) that will be used to manage           | 4          |
| 16 | data management    |      | records and data throughout the review                          |            |
| 17 |                    |      |                                                                 |            |
| 18 |                    |      |                                                                 |            |
| 19 | Study records -    | #11b | State the process that will be used for selecting studies       | 6          |
| 20 | selection process  |      | (such as two independent reviewers) through each phase          |            |
| 21 |                    |      | of the review (that is, screening, eligibility and inclusion in |            |
| 22 |                    |      | meta-analysis)                                                  |            |
| 23 |                    |      |                                                                 |            |
| 24 |                    |      |                                                                 |            |
| 25 |                    |      |                                                                 |            |
| 26 | Study records -    | #11c | Describe planned method of extracting data from reports         | 7          |
| 27 | data collection    |      | (such as piloting forms, done independently, in duplicate),     |            |
| 28 | process            |      | any processes for obtaining and confirming data from            |            |
| 29 |                    |      | investigators                                                   |            |
| 30 |                    |      |                                                                 |            |
| 31 |                    |      |                                                                 |            |
| 32 |                    |      |                                                                 |            |
| 33 | Data items         | #12  | List and define all variables for which data will be sought     | 7-8        |
| 34 |                    |      | (such as PICO items, funding sources), any pre-planned          |            |
| 35 |                    |      | data assumptions and simplifications                            |            |
| 36 |                    |      |                                                                 |            |
| 37 |                    |      |                                                                 |            |
| 38 |                    |      |                                                                 |            |
| 39 | Outcomes and       | #13  | List and define all outcomes for which data will be sought,     | 7          |
| 40 | prioritization     |      | including prioritization of main and additional outcomes,       |            |
| 41 |                    |      | with rationale                                                  |            |
| 42 |                    |      |                                                                 |            |
| 43 |                    |      |                                                                 |            |
| 44 | Risk of bias in    | #14  | Describe anticipated methods for assessing risk of bias of      | See note 1 |
| 45 | individual studies |      | individual studies, including whether this will be done at the  |            |
| 46 |                    |      | outcome or study level, or both; state how this information     |            |
| 47 |                    |      | will be used in data synthesis                                  |            |
| 48 |                    |      |                                                                 |            |
| 49 |                    |      |                                                                 |            |
| 50 |                    |      |                                                                 |            |
| 51 | Data synthesis     | #15a | Describe criteria under which study data will be                | 8-9        |
| 52 |                    |      | quantitatively synthesised                                      |            |
| 53 |                    |      |                                                                 |            |
| 54 |                    |      |                                                                 |            |
| 55 |                    | #15b | If data are appropriate for quantitative synthesis, describe    | 8-9        |
| 56 |                    |      | planned summary measures, methods of handling data and          |            |
| 57 |                    |      | methods of combining data from studies, including any           |            |
| 58 |                    |      |                                                                 |            |
| 59 |                    |      |                                                                 |            |
| 60 |                    |      |                                                                 |            |

planned exploration of consistency (such as I<sup>2</sup>, Kendall's  $\tau$ )

#15c Describe any proposed additional analyses (such as sensitivity or subgroup analyses, meta-regression) 8-9

#15d If quantitative synthesis is not appropriate, describe the type of summary planned 8-9

Meta-bias(es) #16 Specify any planned assessment of meta-bias(es) (such as publication bias across studies, selective reporting within studies) See note 2

Confidence in cumulative evidence #17 Describe how the strength of the body of evidence will be assessed (such as GRADE) See note 3

## Author notes

1. NA for scoping review
2. NA for scoping reviews
3. NA for scoping reviews

The PRISMA-P checklist is distributed under the terms of the Creative Commons Attribution License CC-BY 4.0. This checklist was completed on 02. June 2018 using <http://www.goodreports.org/>, a tool made by the [EQUATOR Network](#) in collaboration with [Penelope.ai](#)

**Table 1. Medline (Ovid) search strategy**

| Search term/line number | Conceptual term of interest | Search term entered into Ovid-Medline                                                 | Number of hits |
|-------------------------|-----------------------------|---------------------------------------------------------------------------------------|----------------|
| 1                       | Substance-Related Disorders | exp Substance-Related Disorders                                                       | 258462         |
| 2                       | Street Drugs                | exp Street Drugs                                                                      | 11263          |
| 3                       | Substance abuser            | substance abus*                                                                       | 49532          |
| 4                       | Substance dependent         | substance dependen*                                                                   | 2720           |
| 5                       | Substance misuse            | substance misus*                                                                      | 2150           |
| 6                       | Problematic substance use   | Problematic substance adj2 (use* or usage or using)                                   | 254            |
| 7                       | People who inject drugs     | (people who inject drug* or PWID)                                                     | 1740           |
| 8                       | Injection drug use          | injection drug "(use or user or usage or using)" or IDU                               | 2794           |
| 9                       | People who use drugs        | "people who use drugs" or PWUD                                                        | 343            |
| 10                      | Illicit substance use       | (illicit or street or illegal) adj2 (drug or substance) adj2 (use* or usage or using) | 5848           |
| 11                      | opioid dependence           | opioid adj2 (addict* or abus* or dependen* or misus* or problem* or disorder*)        | 15537          |
| 12                      | opiate dependence           | opiate adj2 (addict* or abus* or dependen* or misus* or problem* or disorder*)        | 3475           |
| 13                      | narcotic dependence         | narcotic adj2 (addict* or abus* or dependen* or misus* or problem* or disorder*)      | 1279           |
| 14                      | heroin                      | heroin                                                                                | 17865          |
| 15                      | stimulant use disorder      | "stimulant use disorder"                                                              | 40             |

|    |                                                                 |                                                                                                                                          |        |
|----|-----------------------------------------------------------------|------------------------------------------------------------------------------------------------------------------------------------------|--------|
| 16 | exp crack cocaine                                               | exp crack cocaine                                                                                                                        | 1343   |
| 17 | exp cocaine smoking                                             | exp cocaine smoking                                                                                                                      | 4      |
| 18 | cocaine dependence                                              | ((cocaine or crack) adj2 (addict* or abus* or dependen* or misus* or problem* or disorder*))                                             | 11806  |
| 19 | amphetamine dependence                                          | (amphetamine or crystal methamphetamine or crystal meth) adj1 (addict* or abus* or dependen* or misus* or problem* or disorder*)         | 592    |
| 20 | alcohol dependence                                              | alcohol adj2 (addict* or abus* or dependen* or misus* or problem* or disorder*)                                                          | 50104  |
| 21 | cannabis dependence                                             | cannabis adj2 (addict* or abus* or dependen* or disorder*)                                                                               | 1917   |
| 22 | tobacco dependence                                              | (tobacco or nicotine or smok*) adj2 (dependen* or disorder* or cessation)                                                                | 45598  |
| 23 | Diagnosis, Dual (Psychiatry)                                    | Diagnosis, Dual (Psychiatry)                                                                                                             | 3372   |
| 24 |                                                                 | 1 or 2 or 3 or 4 or 5 or 6 or 7 or 8 or 9 or 10 or 11 or 12 or 13 or 14 or 15 or 16 or 17 or 18 or 19 or 20 or 21 or 22 or 23            | 337412 |
| 25 | exp Patient-Centered Care                                       | exp Patient-Centered Care                                                                                                                | 16653  |
| 26 | Patient centered care                                           | ((patient or client or person) adj1 cent?red adj1 (care or treatment* or therap*))                                                       | 20713  |
| 27 | Patient focused care                                            | ((patient or client or person) adj1 focus?ed adj1 (care or treatment* or therap*))                                                       | 425    |
| 28 | Patient participation in treatment planning, process, decisions | (patient or client) adj1 (autonom* or involve* or control or empower*) adj1 (decision making or care or practic* or treatment* or plan*) | 126    |
| 29 | Collaborative care                                              | collaborative adj1 (care or practic* or treatment* or plan*)                                                                             | 3803   |
| 30 | Shared decision-making                                          | (shared or joint or collaborative) adj2 decision making                                                                                  | 6279   |
| 31 | Therapeutic alliance                                            | therapeutic alliance                                                                                                                     | 9027   |
| 32 | Relational practice                                             | relational practic*                                                                                                                      | 44     |

1  
2  
3  
4  
5  
6  
7  
8  
9  
10  
11  
12  
13  
14  
15  
16  
17  
18  
19  
20  
21  
22  
23  
24  
25  
26  
27  
28  
29  
30  
31  
32  
33  
34  
35  
36  
37  
38  
39  
40  
41  
42  
43  
44  
45  
46  
47

|    |                                         |                                                                                                                                         |            |
|----|-----------------------------------------|-----------------------------------------------------------------------------------------------------------------------------------------|------------|
| 33 | Enhanced patient-provider relationship  | (physician or doctor or nurse or professional or provider) adj1 (patient or client) adj1 (enhanc* or alliance* or empower* or support*) | 304        |
| 34 | Enhanced patient-provider communication | (physician or doctor or nurse or professional or provider) adj1 (patient or client) adj1 communicat*                                    | 4230       |
| 35 | Holistic Nursing                        | Holistic Nursing/                                                                                                                       | 3135       |
| 36 | Trauma informed care                    | trauma adj1 (cent?red or informed) adj1 (care or approach or treatment* or therap*)                                                     | 263        |
| 37 | Culturally safe care                    | cultural* adj1 (safe or sensitive) adj1 (care or approach or treatment* or therap*)                                                     | 395        |
| 39 | Family Systems Nursing                  | Family Systems Nursing                                                                                                                  | 64         |
| 39 | Expert patient program                  | expert patient program*                                                                                                                 | 27         |
| 40 |                                         | 25 or 26 or 27 or 28 or 29 or 30 or 31 or 32 or 33 or 34 or 35 or 36 or 37 or 38 or 39                                                  | 40281      |
| 41 |                                         | <b>24 and 40</b>                                                                                                                        | <b>896</b> |

Update and Run Date: June 27, 2018

# BMJ Open

## Patient-Centered Care for Addictions Treatment: A Scoping Review Protocol

|                                 |                                                                                                                                                                                                                                                                                                                                                                                                                                                                                                                                                                                                                                                                                                                                                                                                  |
|---------------------------------|--------------------------------------------------------------------------------------------------------------------------------------------------------------------------------------------------------------------------------------------------------------------------------------------------------------------------------------------------------------------------------------------------------------------------------------------------------------------------------------------------------------------------------------------------------------------------------------------------------------------------------------------------------------------------------------------------------------------------------------------------------------------------------------------------|
| Journal:                        | <i>BMJ Open</i>                                                                                                                                                                                                                                                                                                                                                                                                                                                                                                                                                                                                                                                                                                                                                                                  |
| Manuscript ID                   | bmjopen-2018-024588.R2                                                                                                                                                                                                                                                                                                                                                                                                                                                                                                                                                                                                                                                                                                                                                                           |
| Article Type:                   | Protocol                                                                                                                                                                                                                                                                                                                                                                                                                                                                                                                                                                                                                                                                                                                                                                                         |
| Date Submitted by the Author:   | 27-Nov-2018                                                                                                                                                                                                                                                                                                                                                                                                                                                                                                                                                                                                                                                                                                                                                                                      |
| Complete List of Authors:       | Marchand, Kirsten; University of British Columbia, School of Population and Public Health; Centre for Health Evaluation and Outcome Sciences, Beaumont, Scott; University of British Columbia, School of Population and Public Health; Centre for Health Evaluation and Outcome Sciences, Westfall, Jordan; Canadian Association for People Who Use Drugs MacDonald, Scott; Providence Health Care, Crosstown Clinic Harrison, Scott; Providence Health Care, Crosstown Clinic Marsh, David; Northern Ontario School of Medicine, Schechter, Martin; University of British Columbia, SPPH; Centre for Health Evaluation and Outcome Sciences, Oviedo-Joekes, Eugenia; University of British Columbia, School of Population and Public Health; Centre for Health Evaluation and Outcome Sciences, |
| <b>Primary Subject Heading</b>: | Addiction                                                                                                                                                                                                                                                                                                                                                                                                                                                                                                                                                                                                                                                                                                                                                                                        |
| Secondary Subject Heading:      | Patient-centred medicine, Public health                                                                                                                                                                                                                                                                                                                                                                                                                                                                                                                                                                                                                                                                                                                                                          |
| Keywords:                       | Patient-centered care, Client-centered care, Substance-related disorders, Problematic substance use, Addiction treatment, person-centered care                                                                                                                                                                                                                                                                                                                                                                                                                                                                                                                                                                                                                                                   |
|                                 |                                                                                                                                                                                                                                                                                                                                                                                                                                                                                                                                                                                                                                                                                                                                                                                                  |

SCHOLARONE™  
Manuscripts

## Patient-Centered Care for Addictions Treatment: A Scoping Review Protocol

### Authors:

Kirsten Marchand<sup>1,2</sup>

Scott Beaumont<sup>1</sup>

Jordan Westfall<sup>3</sup>

Scott MacDonald<sup>4</sup>

Scott Harrison<sup>4</sup>

David C. Marsh<sup>5</sup>

Martin T. Schechter<sup>1,2</sup>

Eugenia Oviedo-Joekes<sup>1,2</sup>

### Author affiliation and addresses:

1. School of Population and Public Health, University of British Columbia, 2206 East Mall, Vancouver, BC, V6T 1Z3, Canada.
2. Centre for Health Evaluation & Outcome Sciences, Providence Health Care, St. Paul's Hospital, 575- 1081 Burrard St., Vancouver, BC, V6Z 1Y6, Canada.
3. Canadian Association for People Who Use Drugs, 46 East Hastings St., Vancouver, BC V6A 1N1, Canada.
4. Providence Health Care, Providence Crosstown Clinic, 84 West Hastings St., Vancouver, BC V6B 1G6, Canada.
5. Northern Ontario School of Medicine, 935 Ramsey Lake Road, Sudbury, ON P3E 2C6, Canada.

### Corresponding Author:

Kirsten Marchand

575-1081 Burrard St., Vancouver, BC, V6Z 1Y6, Canada.

[kmarchand@cheos.ubc.ca](mailto:kmarchand@cheos.ubc.ca)

778-847-8715

**Word count** (excluding title page, abstract, references, figures and tables): 3,244

**Keywords:** Patient-centered care; client-centered care; person-centered care; addiction treatment; substance-related disorders; problematic substance use

**ABSTRACT:**

**Introduction:** Substance use disorders are chronic conditions that require a multidimensional treatment approach. Despite ongoing efforts to diversify such treatments, evidence continues to illuminate modest rates of treatment engagement and perceived barriers to treatment. Patient-centered care (PCC) is one approach that may strengthen the responsiveness of treatments for people with problematic substance use. The aim of this scoping review is to explore how the principles of PCC have been implemented and operationalized in health care settings for people with problematic substance use.

**Methods and analysis:** This scoping review follows the iterative stages of the Arksey and O'Malley framework. Both empirical (from Medline, Embase, PsycINFO, CINAHL and ISI Web of Science) and grey literature references will be considered if they focused on populations with problematic substance use and described or measured PCC or one of its principles in a health-oriented context. Two reviewers will independently screen references in two successive stages of title/abstract screening and then full-text screening for references meeting title/abstract criteria. A descriptive overview, tabular and/or graphical summaries, and a directed content analysis will be carried out on extracted data. This scoping review has been registered with Open Science Framework (<https://osf.io/5swvd/>).

**Ethics and dissemination:** This review will systematically examine the extent and nature of existing evidence of PCC in addiction research and clinical practice. Such evidence will contribute to the operationalization of PCC for people with problematic substance use. A multidisciplinary team has been gathered to represent the needs of people with problematic substance use, health care providers, and decision makers. The team's knowledge users will be engaged throughout this review and will participate in dissemination activities (e.g., workshops, presentations, publications, reports).

#### **ARTICLE SUMMARY: (Strengths and Limitations of this Study)**

- This is the first scoping review to systematically explore which principles of patient-centered care have been implemented and their operationalization among people with problematic substance use.
- A multidisciplinary team composed of drug policy advocates, health care providers, decision makers, and academics will lead this scoping review.
- Both the population (people with problematic substance use) and concept of interest (patient-centered care) have been indexed using a variety of terms, which poses a challenge to ensuring breadth of the search.
- A comprehensive search strategy has been developed in consultation with a health sciences librarian to promote a sensitive scope of empirical and grey literature sources.
- This iterative scoping review study has been registered with Open Science Framework to enhance its transparency (<https://osf.io/5swvd/>).

## **1. INTRODUCTION**

Alcohol, tobacco, and illicit substance use continues to be a significant public health concern that accounts for 11.2% of the global burden of disease and 21.1% of all deaths.[1] People with substance use disorders are at an increased risk of mortality and morbidity;[2 3] and some may be further affected by lost family and social support, criminal justice involvement, and social marginalization.[4] However, not all people with problematic substance use follow the same trajectory. Instead, there are individual

1  
2  
3  
4 variations in the personal meaning of substance use, in the intensity and frequency of  
5 use, and its associated harms.[4-6] This heterogeneity in substance use disorders  
6 contributes to the complexity of its treatment.  
7  
8

9  
10 It is increasingly accepted that there is no 'one size fits all' treatment approach for  
11 problematic substance use and that a range of treatments are required to meet the  
12 diverse needs and preferences of this population.[5 6] For example, effective  
13 pharmacological therapies are available to assist with the treatment of some, but not all,  
14 substance use disorders (e.g., tobacco, alcohol, opioid dependence).[7] Treatment may  
15 also include psychosocial interventions (e.g., cognitive behavioural therapy, contingency  
16 management, or strengths-based treatment) either in combination with pharmacological  
17 therapies or alone.[8 9] Regardless of the treatment provided, the main goal is to  
18 engage clients in care, since treatment engagement is widely recognized as one of the  
19 most important predictors of substance use outcomes.[10 11]  
20  
21  
22  
23  
24  
25  
26  
27  
28  
29

30 As such, tremendous efforts have been made towards improving treatment  
31 engagement. Examples include: diversified treatment settings that offer traditional  
32 residential and hospital-based programs, specialized outpatient programs, and more  
33 recently, integrated service models.[7 12] To increase the rate of detection and  
34 treatment engagement, opportunities for screening and brief intervention have also  
35 been incorporated and expanded outside of specialized substance use treatment  
36 programs.[13] Various problem-to-services matching designs have also been developed  
37 to increase successful treatment engagement by strengthening alignment between  
38 client's needs and services offered.[14-17]  
39  
40  
41  
42  
43  
44  
45  
46  
47  
48

49 In spite of these important developments, research continues to demonstrate quite  
50 mixed uptake of these practices,[17] as well as varying rates of treatment engagement.  
51 [7 12] Globally, it is estimated that 1 out of every 6 people in need of substance use  
52 treatment is able to receive it; and this does not imply receipt of evidence- or human-  
53  
54  
55  
56  
57  
58

1  
2  
3  
4 rights based treatments.[18] Even when examining evidence-based treatments, such as  
5  
6 opioid agonist treatment, recent systematic reviews suggest a wide range in the rate of  
7  
8 treatment retention (e.g., from 37%–91% at 12-month follow-up).[19] There is also a  
9  
10 substantial body of qualitative research that has revealed several areas in which clients  
11  
12 (and in some cases providers) have perceived challenges with engaging in treatment. A  
13  
14 few examples include perceived provider misunderstanding of treatment goals,[20]  
15  
16 discrepancies between client and provider's treatment goals,[21] a lack of treatment  
17  
18 responsiveness to client's perceived needs,[22 23] challenges with involving clients in  
19  
20 treatment planning and delivery,[24] and perceived power imbalances, stigma and  
21  
22 discrimination.[25-27] This evidence suggests that there remains a need to explore *how*  
23  
24 treatment processes can be designed to better respond to client's unique needs, while  
25  
26 also considering the diversity of treatments and settings required.

27  
28 Patient-centered care (PCC) is one potential approach warranting further exploration.  
29  
30 PCC is rooted in a philosophy that *'puts the person first'*. It aims to meet client's unique  
31  
32 needs and preferences, enhance their experiences with care, and involve them in all  
33  
34 elements of treatment planning and delivery.[28] Some of its origins can be traced back  
35  
36 to Carl Rogers' client-centered therapy, which emphasized unconditional positive  
37  
38 regard, empathy, and genuineness in the therapeutic process.[29] Over the last two  
39  
40 decades, as the concept of PCC has garnered increased attention across the health  
41  
42 and social sciences[30 31], its operationalization has expanded beyond the role of the  
43  
44 therapeutic relationship. For example, in nursing, empirically based conceptual  
45  
46 frameworks[32-34] agree that PCC entails an approach to care that is holistic,  
47  
48 individualized, respectful, and empowering. In medicine, the proposed frameworks  
49  
50 converge around similar, but slightly reframed dimensions. Here, emphasis is on a  
51  
52 biopsychosocial perspective, seeing the 'patient-as-person', enhancing the therapeutic  
53  
54  
55  
56  
57  
58

1  
2  
3 alliance, and sharing power and responsibility.[35-40] Differences in the conceptual  
4 meaning of PCC across disciplines have resulted in varying operationalizations.  
5  
6

7  
8 That the meaning of PCC is currently somewhat discipline-specific poses challenges to  
9 determining the relationship between PCC and treatment process and outcome  
10 indicators. For example, a recent meta-analysis showed mixed effects of PCC (defined  
11 as shared control or decisions and/or consultations focused on whole person) on  
12 improved quality of care, treatment satisfaction and health outcomes.[41] It also found  
13 support for generally positive effects of PCC on consultation process measures (e.g.,  
14 communication about treatments; levels of empathy),[41] suggesting that PCC might  
15 overcome some of the challenges clients have historically experienced engaging in  
16 substance use treatment.  
17  
18  
19  
20  
21  
22  
23  
24  
25

26 Indeed, elements of PCC have been recommended or defined as part of some addiction  
27 treatment approaches.[6] For example, principles of respect, empathy, or empowerment  
28 are integral to some treatments (e.g., motivational interviewing, strengths-based  
29 treatment). However, to our knowledge, it is not known to what extent each of the  
30 dimensions of PCC have been purposefully implemented or tested across the spectrum  
31 of treatment approaches for people with problematic substance use. Bringing this  
32 evidence together in a systematic scoping review has the potential to identify cross-  
33 setting, discipline and population dimensions of PCC that have been defined,  
34 implemented and empirically explored.  
35  
36  
37  
38  
39  
40  
41  
42  
43  
44

## 45 **2. OBJECTIVE**

46  
47 The present scoping review will systematically explore how the principles of patient-  
48 centered care have been implemented and operationalized in health care settings for  
49 people with problematic substance use. Specifically, this review aims to examine the  
50 extent and nature of existing evidence of PCC in addiction research and clinical  
51 practice.  
52  
53  
54  
55  
56  
57  
58

### 3. METHODS AND ANALYSIS

This scoping review methodology will apply the classic framework developed by Arksey and O'Malley,[42] recent enhancements[43-45] and best practices for conducting and reporting systematic reviews (i.e., Preferred Reporting Items for Systematic Review and Meta-Analysis for Protocols and Scoping Reviews (PRISMA-P and PRISMA-ScR; Supplement 1).[46 47] Accordingly, a reflexive and iterative approach will be maintained; particularly during the study screening and data extraction phases, which may become more refined throughout the review. The protocol (and any potential revisions) has been registered through Open Science Framework (<https://osf.io/5swvd/>).[48] DistillerSR software for systematic reviews[49] will be used by both reviewers to support screening, extraction, monitoring, and the synthesis of findings.

#### 3.1. Stage 1: Defining the Research Question

The research question was developed as a broad framing of the population (i.e., people with problematic substance use), the concept (i.e., patient-centered care) and the context (i.e., health-oriented settings) to be explored. Thus, this scoping review asks:

1. Which patient-centered care principles have been implemented in health-oriented settings for people with problematic substance use?
2. How have these patient-centered care principles been operationalized when used in health-oriented settings for people with problematic substance use?
3. What outcomes from the implementation of patient-centered care principles have been empirically measured or tested?

#### 3.2. Stage 2: Identifying Relevant Literature

Our goal in developing this search strategy (Supplement 2) is to undertake a comprehensive review of the existing evidence base. However, this particular research

1  
2  
3  
4 question poses a challenge to keyword selection due to the evolution of terms used to  
5 describe both the population and concept of interest. For instance, problematic  
6 substance use has grown from the pejorative language of the 'addict' to a health-  
7 oriented view of 'substance dependent populations' and now onto the more person-  
8 focused discourse of 'people with problematic substance use'. [50 51]  
9  
10  
11  
12

13  
14 Likewise, as described above, conceptual frameworks of PCC have also varied, adding  
15 to the complexity of this search. To overcome this challenge, we have developed a  
16 search strategy informed by the most consistently identified and operationalized  
17 principles of PCC (in the abovementioned frameworks), as well as keywords and MeSH  
18 terms from systematic reviews [52 53] and empirical references [54-56] previously  
19 conducted with our population of interest: (1) *understanding the whole person* to  
20 account for the biological, psychological and social aspects of patients' illnesses; (2)  
21 *exploring the disease and illness experience* to understand the personal meaning of  
22 illness and treatment for the patient; (3) *finding common ground* where power,  
23 knowledge and responsibility are shared between the patient and provider; and (4)  
24 *enhancing the patient-provider relationship* to improve the positive outcomes of  
25 treatments provided. We have also engaged in an extensive consultation process with  
26 an experienced Health Science Librarian (at the University of British Columbia) as well  
27 as the knowledge users represented in our team (authors SM and SH). The search  
28 strategy will also be peer reviewed (i.e., PRESS) to promote its rigor and feasibility. [57]  
29  
30  
31  
32  
33  
34  
35  
36  
37  
38  
39  
40  
41  
42  
43  
44

45 Given our interest in undertaking a comprehensive review of existing research and  
46 clinical guidelines related to PCC in the addictions field, both empirical (primary studies,  
47 previous reviews) and grey literature documents (conference abstracts, reports, and  
48 clinical guidelines) will be included in our search. The search for empirical sources will  
49 be conducted in the most important electronic databases for the medical and social  
50 sciences: Medline (Ovid), Embase (Ovid), PsycINFO, CINAHL, and ISI Web of Science.  
51  
52  
53  
54  
55  
56  
57  
58

1  
2  
3  
4 The search strategy has been developed in Medline (Ovid) (Supplement 2) and will be  
5 adapted to the other databases. The search strategy will include subject headings,  
6 related terms, and keywords as necessary for the research question. Boolean logic and  
7 operators (i.e., 'and', 'or', 'not') will be used to combine and refine search terms and  
8 concepts.  
9  
10  
11  
12

13  
14 For the grey literature search strategy, we will use recommended resources[58] and  
15 consult with the Health Sciences Librarian and our team's knowledge users to devise a  
16 database specific approach. The search for abstracts, reports, and clinical guidelines  
17 will be carried out in several Canadian-specific databases: British Columbia Guidelines  
18 and Protocols Databases, CPG Infobase, the Registered Nurses' Association Clinical  
19 Practice Guidelines Program, and Des Libris. For international grey literature  
20 documents, we will search National Guideline Clearinghouse, TRIP, Google, and  
21 Google Scholar databases.  
22  
23  
24  
25  
26  
27  
28  
29

### 30 **3.3. Stage 3: Study Selection**

31  
32 A two-stage collaborative review process will be used to select references. Eligibility  
33 criteria have been developed *a priori*, in consultation with the study team. The screening  
34 form will be piloted on the first 20 citations of the initial Medline (Ovid) search to test  
35 both the criteria and reviewer agreement. Two independent reviewers (authors KM and  
36 SB) will apply eligibility criteria during the initial title/abstract review. After each review  
37 stage, the reviewer's agreement will be assessed and a third reviewer (author EOJ) will  
38 be consulted in cases of disagreement, until consensus is achieved.  
39  
40  
41  
42  
43  
44  
45  
46

47 A title/abstract (or executive summary for reports and guidelines) will be eligible for full  
48 text screening if it:  
49  
50

51  
52 a) Refers to people with problematic substance use (including tobacco, alcohol,  
53 cannabis, stimulant, opioid use, or dual diagnoses);  
54  
55  
56  
57  
58

1  
2  
3  
4 b) Is about delivering patient-centered care or one of its principles (including care that  
5 understands the whole person; explores the disease and illness experience; finds  
6 common ground and enhances the patient-provider relationship);  
7  
8

9  
10 c) Is set in a health-oriented context (including inpatient or outpatient hospital settings,  
11 emergency departments, community-based or primary care health settings, and any  
12 specialized drug treatment or low-threshold agencies and programs; excluding prison-  
13 based health programs and self-help models such as narcotics or alcoholics  
14 anonymous); and  
15  
16  
17  
18

19  
20 d) Was published between January 1, 1960 and July 1, 2018 in English, French,  
21 Spanish, Italian, Portuguese or German.  
22  
23

24  
25 Full text empirical articles, reports and guidelines will then be obtained for  
26 titles/abstracts meeting these above criteria and will undergo further screening. In  
27 addition to the title/abstract criteria, full texts will be included if:  
28  
29

30  
31 e) It provided an operational definition of the patient-centered care framework that was  
32 delivered to people with problematic substance use in the health-oriented context; and  
33  
34

35  
36 f) It observed at least one patient outcome (e.g., treatment engagement, substance use  
37 behaviours, treatment satisfaction) and/or treatment process outcome (e.g., provider  
38 communication skills) of the patient-centered care approach (this criterion pertains to  
39 empirical articles only).  
40  
41  
42  
43

44  
45 As such, articles that provide only a recommendation to adopt PCC or an opinion of  
46 how PCC should be implemented in health-oriented settings for people with problematic  
47 substance use will not be included.  
48  
49

### 50 51 **3.4. Stage 4: Data Extraction**

52

53  
54 Results of the search will be collated in DistillerSR,[49] allowing the research team to  
55 de-duplicate and perform data extraction. We will follow recommended data charting  
56  
57  
58

methods[42 47] to systematically capture relevant details for studies/reports and guidelines (Table 1). Data charting forms will be piloted with the first 5 empirical and grey literature references and may be adapted thereafter (with input from the teams' knowledge users).

**Table 1. Data extraction and charting for empirical and grey literature sources**

| Domain/Subdomain                                     | Description                                                                                                                                                                                |
|------------------------------------------------------|--------------------------------------------------------------------------------------------------------------------------------------------------------------------------------------------|
| <b>1. General Document Details</b>                   |                                                                                                                                                                                            |
| 1.1 Reference Type                                   | Empirical study, case study, review, commentary, report, guideline                                                                                                                         |
| 1.2 Publication Year                                 | Year of publication                                                                                                                                                                        |
| 1.3 Country and Location                             | Country of publication (and location if provided)                                                                                                                                          |
| 1.4 Publication Language                             | Language of publication                                                                                                                                                                    |
| <b>2. Empirical Study References (if applicable)</b> |                                                                                                                                                                                            |
| 2.1 Research objective                               | What was the research objective or specific question to be tested (if relevant)                                                                                                            |
| 2.2 Study design                                     | Was the study design observational, experimental, or qualitative?                                                                                                                          |
| 2.3 Study population                                 | What were the eligibility criteria? Would the population be classified as primarily: tobacco, cannabis, alcohol, opioid, stimulant, or comorbid substance use and mental illness?          |
| 2.4 Patient-centered care intervention               | What was the operational definition of patient-centered care used (including the definition of specific principles, if available)? How long was the intervention provided or observed for? |
| 2.5 Context/setting                                  | What health-oriented context was the PCC intervention apart of? What health professionals were involved?                                                                                   |

|                                                      |                                                                                                                                                                                                                                                                                         |
|------------------------------------------------------|-----------------------------------------------------------------------------------------------------------------------------------------------------------------------------------------------------------------------------------------------------------------------------------------|
| 2.6 Study outcomes                                   | For quantitative studies, what types of patient outcomes and/or process outcomes were measured (e.g., treatment engagement, changes in substance use behaviours, health status, treatment satisfaction, provider communication)? For qualitative studies, what outcomes were described? |
| 2.7 Important results                                | What were the main results of the study? Were there any important sub-group (e.g., by sex and gender, by primary substance, by health care provider) analyses?                                                                                                                          |
| 2.8 Limitations                                      | What limitations did the authors describe? What others might there be?                                                                                                                                                                                                                  |
| <b>3. Grey Literature References (if applicable)</b> |                                                                                                                                                                                                                                                                                         |
| 3.1 Target audience                                  | Is there a target audience specified for the guideline/report (e.g., policy/decision maker, health care provider, patient/client/family)                                                                                                                                                |
| 3.2 Reference population                             | If available, how was the target patient population defined? Any specific eligibility criteria used? Would the population be classified as primarily: tobacco, cannabis, alcohol, opioid, stimulant, or comorbid substance use and mental illness?                                      |
| 3.3 Patient-centered care operational definition     | What was the operational definition of patient-centered care used (including the definition of specific principles, if available)?                                                                                                                                                      |
| 3.4 Context/setting                                  | What health-oriented context was the PCC intervention apart of? What health professionals were involved?                                                                                                                                                                                |
| 3.5 Intervention and outcomes                        | If applicable, was a specific patient-centered intervention described (e.g., a training module, a clinical approach)?                                                                                                                                                                   |

|                        |                                                                                                                                                                         |
|------------------------|-------------------------------------------------------------------------------------------------------------------------------------------------------------------------|
|                        | Were any patient outcomes and/or process outcomes of PCC reported (e.g., treatment engagement, substance use outcomes, treatment satisfaction, provider communication)? |
| 3.6 Program evaluation | If available, what results were reported from any ongoing program evaluations?                                                                                          |

### 3.5. Stage 5: Collating, Summarizing and Reporting the Results

We will present a descriptive overview (including tabular and/or graphical summaries) of the eligible full texts.[42] We will also summarize studies by each broader category of substances primarily used (i.e., tobacco, cannabis, alcohol, opioid, stimulant, dual diagnosis). Displaying information in this way will highlight population-specific similarities and differences in PCC, its definition and outcomes. This will facilitate the identification of future directions for research and practice. All tables and charts will include narrative summaries, relating the findings to the review's research question. Additionally, we will develop a final report of the review[47] according to PRISMA-ScR guidelines.[46]

Given that one aim of this review is to understand *how* PCC has been defined and implemented in health care services for people with problematic substance use, a directed content analysis will be carried out on included guidelines. This approach has been deemed most suitable to the present review, since it allows existing theory (in our case, principles of PCC defined a priori to guide the coding and analysis), while still allowing new evidence to emerge.[59] Specifically, we are interested in qualitatively analyzing the definition of PCC adopted in the guidelines, how it was developed, which health care providers were involved, and any outcomes or ongoing evaluations of the program. To do so, data from the guidelines will be imported to MAXQDA, version 12,[60] a qualitative analysis software program that supports a multi-user approach.

1  
2  
3  
4 This analysis will be conducted by authors KM, SB, and EOJ, who have prior  
5  
6 experience conducting thematic analysis on similar topics.[61 62] As is common in  
7  
8 directed content qualitative analysis,[59] a coding framework will be developed a priori,  
9  
10 and will then be applied by authors KM and SB independently. Results from this  
11  
12 analysis will be summarized and—where relevant—numerical summaries may also be  
13  
14 used to provide additional context to the themes (e.g., number of clients treated,  
15  
16 number of staff).

### 17 18 **3.6. Stage 6: Consultation Process and Engagement of Knowledge Users**

19  
20 The ultimate aim of this review is to generate evidence that can be used to inform  
21  
22 decision-makers and health care providers on the feasibility, implications, and potential  
23  
24 outcomes associated with PCC for substance use treatment. To achieve this goal, we  
25  
26 have engaged a multi-disciplinary team of knowledge users who represent the needs of:  
27  
28 people with problematic substance use, health care providers, and decision makers.  
29  
30 Consulting with the teams' health care providers and decision-makers (authors SH, SM,  
31  
32 and DCM) will promote a methodology that reflects the realities of patient-provider roles  
33  
34 and the health care system's organization. Also, our team's drug policy knowledge user  
35  
36 (author JW) represents a national organization of people who use drugs and this critical  
37  
38 perspective will ensure that all aspects of this review are rooted in the client-centered  
39  
40 needs of this diverse population. The specific contributions of the Knowledge Users to  
41  
42 each stage of this review have been defined throughout. At this time, Knowledge Users  
43  
44 have reviewed early drafts of the search strategy, identifying additional terms that are  
45  
46 important for inclusion given the population, concept, and contexts of interest (e.g.,  
47  
48 trauma-informed care and culturally-safe care). Knowledge Users have also provided  
49  
50 several grey-literature references (clinical guidelines and reports) to be considered for  
51  
52 inclusion. As the project continues to evolve, all Knowledge Users will be involved in  
53  
54 supporting the interpretation of findings and their dissemination.  
55  
56  
57  
58

### 3.7 PATIENT AND PUBLIC INVOLVEMENT

This scoping review protocol has engaged the expertise of a national organization of people who use(d) drugs through the involvement of this organizations' President. This knowledge user (author JW) has made contributions to the development of the research question and will also be extensively involved during the interpretation and dissemination phases of this project.

### 4. ETHICS AND DISSEMINATION

As substance use disorders are increasingly recognized as a chronic condition often marked by cycles of relapse and recovery, the public health care system is considering how existing treatment and intervention approaches can be optimized to meet the long-term and evolving goals of clients.[18] Adopting patient- or person-centered approaches may increase the responsiveness of existing treatments to individual client needs, expectations, and preferences. To our knowledge, this review will be the first to systematically examine the extent and nature of existing evidence of PCC in addiction research and clinical practice.

Our dissemination strategy will utilize traditional approaches, including open-access peer-reviewed publication(s), scientific presentations, and a report. Additionally, we are committed to promoting further action based on the potential findings of this review. Therefore, we will host a half-day roundtable meeting—bringing together people with problematic substance use, health care providers (from diverse settings), and decision-makers to brainstorm potential opportunities for future areas of research and clinical practice work. For example, we may engage in a concept mapping exercise, using the findings of this review to integrate stakeholders' knowledge, interpretations, and

1  
2  
3  
4 priorities into practice. The multidisciplinary nature of this team will facilitate and support  
5  
6 our goal of bringing together these different representatives together.  
7  
8  
9

#### 10 **AUTHOR CONTRIBUTIONS:**

11  
12 KM (review guarantor) led the design and conceptualisation of this review and drafted the  
13 protocol with primary support from SB, MTS, and EOJ. SB, SH, and EOJ were involved in  
14 refining the search strategy, including key words. SM, SH, DCM, and JW were involved in  
15 establishing eligibility criteria and data extraction forms. All authors provided feedback on the  
16 manuscript and approval to the publishing of this protocol manuscript.  
17  
18

19  
20 **AMENDMENTS:** Not applicable  
21

22  
23 **SUPPORT (SOURCES, SPONSOR, ROLE OF SPONSOR OR FUNDER):** Funding for this  
24 scoping review has been provided by the Canadian Institutes of Health Research (Operating  
25 Grant: Opioid Crisis Knowledge Synthesis). We would also like to acknowledge Ursula Ellis,  
26 Health Sciences Librarian (University of British Columbia), who has provided invaluable  
27 expertise to the development and refinement of the search strategy of this scoping review.  
28  
29

30  
31 **COMPETING INTERESTS:** The authors have no competing interests to declare.  
32  
33  
34  
35

#### 36 **References**

- 37  
38  
39 1. Gakidou E, Afshin A, Abajobir AA, et al. Global, regional, and national comparative risk  
40 assessment of 84 behavioural, environmental and occupational, and metabolic risks or  
41 clusters of risks, 1990-2016: A systematic analysis for the Global Burden of Disease Study  
42 2016. *The Lancet* 2017;390(10100):1345-422. doi: 10.1016/S0140-6736(17)32366-8  
43  
44 2. Holford TR, Meza R, Warner KE, et al. Tobacco control and the reduction in smoking-  
45 related premature deaths in the united states, 1964-2012. *JAMA* 2014;311(2):164-71. doi:  
46 10.1001/jama.2013.285112  
47  
48 3. Whiteford HA, Degenhardt L, Rehm J, et al. Global burden of disease attributable to  
49 mental and substance use disorders: findings from the Global Burden of Disease Study  
50 2010. *Lancet* 2013;382(9904):1575-86. doi: 10.1016/s0140-6736(13)61611-6 [published  
51 Online First: 2013/09/03]  
52  
53 4. Nutt DJ, King LA, Phillips LD. Drug harms in the UK: a multicriteria decision analysis.  
54 *Lancet* 2010;376(9752):1558-65. doi: [http://dx.doi.org/10.1016/S0140-6736\(10\)61462-6](http://dx.doi.org/10.1016/S0140-6736(10)61462-6)  
55  
56  
57  
58

- 1  
2  
3 5. Hammer G. Trust and relationship as cornerstones of successful psychotherapy. In:  
4 Tatarsky A, Tatarsky A, eds. Harm reduction psychotherapy: A new treatment for drug and  
5 alcohol problems. Lanham, MD, US: Jason Aronson 2002:106-35.
- 6  
7 6. Abou-Saleh MT, Tarter RE, Salloum IM. Substance use disorders. In: Mezzich JE, Botbol M,  
8 Christodoulou GN, et al., eds. Person centered psychiatry. Cham, Switzerland: Springer  
9 International Publishing 2016:325-43.
- 10  
11 7. Substance Abuse and Mental Health Services Administration. Chapter 4, Early  
12 Intervention, Treatment, And Management of Substance Use Disorders. In: Office of the  
13 Surgeon General (US), ed. Facing Addiction in America: The Surgeon General's Report on  
14 Alcohol, Drugs, and Health. Washington (DC), 2016.
- 15  
16 8. Jhanjee S. Evidence Based Psychosocial Interventions in Substance Use. *Indian Journal of*  
17 *Psychological Medicine* 2014;36(2):112-18. doi: 10.4103/0253-7176.130960
- 18  
19 9. Magill M, Ray LA. Cognitive-Behavioral Treatment With Adult Alcohol and Illicit Drug  
20 Users: A Meta-Analysis of Randomized Controlled Trials. *Journal of Studies on Alcohol and*  
21 *Drugs* 2009;70(4):516-27. doi: 10.15288/jsad.2009.70.516
- 22  
23 10. Hubbard RL, Craddock SG, Flynn PM, et al. Overview of One-Year Follow-Up Outcomes  
24 in the Drug Abuse Treatment Outcome Study (DATOS). *Psychology of Addictive Behaviors*  
25 1997;11(4 special issue):261-78.
- 26  
27 11. Simpson DD, Joe GW, Rowan-Szal GA. Drug abuse treatment retention and process  
28 effects on follow-up outcomes. *Drug Alcohol Depend* 1997;47(3):227-35.
- 29  
30 12. Substance Abuse and Mental Health Services Administration. Chapter 6, Health Care  
31 Systems and Substance Use Disorders. In: US Department of Health and Human Services,  
32 ed. Facing Addiction in America: The Surgeon General's Report on Alcohol, Drugs, and  
33 Health Washington (DC)2016.
- 34  
35 13. Babor TF, McRee BG, Kassebaum PA, et al. Screening, Brief Intervention, and Referral to  
36 Treatment (SBIRT). *Substance Abuse* 2007;28(3):7-30. doi: 10.1300/J465v28n03\_03
- 37  
38 14. Marsh JC, Cao D, Shin HC. Closing the Need-Service Gap: Gender Differences in Matching  
39 Services to Client Needs in Comprehensive Substance Abuse Treatment. *Social work*  
40 *research* 2009;33(3):183-92. [published Online First: 2009/09/01]
- 41  
42 15. Hser YI, Polinsky ML, Maglione M, et al. Matching clients' needs with drug treatment  
43 services. *J Subst Abuse Treat* 1999;16(4):299-305. [published Online First: 1999/06/01]
- 44  
45 16. Mattson ME, Babor, T, Cooney, N, et al. Matching patients with alcohol disorders to  
46 treatments: Clinical implications from Project MATCH. *Journal of Mental Health*  
47 1998;7(6):589-602. doi: 10.1080/09638239817743
- 48  
49 17. Alexander JA, Nahra TA, Lemak CH, et al. Tailored treatment in the outpatient substance  
50 abuse treatment sector: 1995-2005. *Journal of Substance Abuse Treatment* 2008;34(3):282-  
51 92.
- 52  
53 18. United Nations Office on Drugs and Crime. International Standards for the Treatment of  
54 Drug Use Disorders. Geneva: World Health Organization, 2017.

- 1  
2  
3 19. Timko C, Schultz NR, Cucciare MA, et al. Retention in medication-assisted treatment for  
4 opiate dependence: A systematic review. *J Addict Dis* 2016;35(1):22-35. doi:  
5 10.1080/10550887.2016.1100960 [published Online First: 2015/10/16]  
6  
7 20. Rance J, Treloar C. "We are people too": consumer participation and the potential  
8 transformation of therapeutic relations within drug treatment. *International Journal of*  
9 *Drug Policy* 2015;26(1):30-36. doi: 10.1016/j.drugpo.2014.05.002  
10  
11 21. Joosten EAG, De Weert-Van Oene GH, Sensky T, et al. Treatment goals in addiction  
12 healthcare: The perspectives of patients and clinicians. *International Journal of Social*  
13 *Psychiatry* 2011;57(3):263-76. doi: 10.1177/0020764009354835  
14  
15 22. McNeil R, Kerr T, Pauly B, et al. Advancing patient-centered care for structurally  
16 vulnerable drug-using populations: A qualitative study of the perspectives of people who  
17 use drugs regarding the potential integration of harm reduction interventions into  
18 hospitals. *Addiction* 2016;111(4):685-94. doi: 10.1111/add.13214  
19  
20 23. Pauly B, McCall J, Browne AJ, et al. Toward cultural safety: Nurse and patient  
21 perceptions of illicit substance use in a hospitalized setting. *Advances in Nursing Science*  
22 2015;38(2):121-35. doi: 10.1097/ANS.0000000000000070  
23  
24 24. Bryant J, Bryant J, Saxton M, et al. Consumers' and providers' perspectives about  
25 consumer participation in drug treatment services: is there support to do more? What are  
26 the obstacles? *Drug and Alcohol Review* 2008;27(2):138-44. doi:  
27 10.1080/09595230701829405  
28  
29 25. Fischer J, Neale J. Involving drug users in treatment decisions: An exploration of  
30 potential problems. *Drugs: Education, Prevention & Policy* 2008;15(2):161-75. doi:  
31 10.1080/09687630701391604  
32  
33 26. Strike C, Rufo C. Embarrassing, degrading, or beneficial: patient and staff perspectives  
34 on urine drug testing in methadone maintenance treatment. *Journal of Substance Use*  
35 2010;15(5):303-12. doi: 10.3109/14659890903431603  
36  
37 27. Palis H, Marchand K, Peng D, et al. Factors Associated with Perceived Abuse in the  
38 Health Care System Among Long-Term Opioid Users: A Cross-Sectional Study. *Subst Use*  
39 *Misuse* 2016;51(6):763-76. doi: 10.3109/10826084.2016.1155605 [published Online First:  
40 2016/04/21]  
41  
42 28. Berwick DM. What 'patient-centered' should mean: confessions of an extremist. *Health*  
43 *Aff (Millwood)* 2009;28(4):w555-65. doi: 10.1377/hlthaff.28.4.w555 [published Online  
44 First: 2009/05/21]  
45  
46 29. Rogers C. On Becoming a Person. A Therapist's View of Psychotherapy. Boston:  
47 Houghton Mifflin Company 1961.  
48  
49 30. Institute of Medicine (IOM). Crossing the Quality Chasm: A New Health System for the  
50 21st Century. 2001.  
51  
52 31. Beaulieu MD. President's message: toward a patient-centred health care system. *Can*  
53 *Fam Physician* 2013;59(1):109,10. [published Online First: 2013/01/24]  
54  
55  
56  
57  
58

- 1  
2  
3 32. Slater L. Person-centredness: a concept analysis. *Contemp Nurse* 2006;23(1):135-44.  
4 doi: 10.5555/conu.2006.23.1.135 [published Online First: 2006/11/07]  
5
- 6 33. Hobbs JL. A dimensional analysis of patient-centered care. *Nurs Res* 2009;58(1):52-62.  
7 doi: 10.1097/NNR.0b013e31818c3e79 [published Online First: 2008/12/19]  
8
- 9 34. Morgan S, Yoder LH. A concept analysis of person-centered care. *J Holist Nurs*  
10 2012;30(1):6-15. doi: 10.1177/0898010111412189 [published Online First: 2011/07/21]  
11
- 12 35. Mead N, Bower P. Patient-centredness: a conceptual framework and review of the  
13 empirical literature. *Soc Sci Med* 2000;51(7):1087-110. [published Online First:  
14 2000/09/27]  
15
- 16 36. Stewart M. Towards a global definition of patient centred care. *BMJ*  
17 2001;322(7284):444-5. [published Online First: 2001/02/27]  
18
- 19 37. Robinson JH, Callister LC, Berry JA, et al. Patient-centered care and adherence:  
20 definitions and applications to improve outcomes. *J Am Acad Nurse Pract* 2008;20(12):600-  
21 7. doi: 10.1111/j.1745-7599.2008.00360.x [published Online First: 2009/01/06]  
22
- 23 38. McMillan SS, Kendall E, Sav A, et al. Patient-centered approaches to health care: a  
24 systematic review of randomized controlled trials. *Medical care research and review : MCRR*  
25 2013;70(6):567-96. doi: 10.1177/1077558713496318 [published Online First:  
26 2013/07/31]  
27
- 28 39. Scholl I, Zill JM, Harter M, et al. An integrative model of patient-centeredness - a  
29 systematic review and concept analysis. *PLoS One* 2014;9(9):e107828. doi:  
30 10.1371/journal.pone.0107828 [published Online First: 2014/09/18]  
31
- 32 40. Santana MJ, Manalili K, Jolley RJ, et al. How to practice person-centred care: A  
33 conceptual framework. *Health Expectations : An International Journal of Public Participation*  
34 *in Health Care and Health Policy* 2018;21(2):429-40. doi: 10.1111/hex.12640  
35
- 36 41. Dwamena F, Holmes-Rovner M, Gaulden CM, et al. Interventions for providers to  
37 promote a patient-centred approach in clinical consultations. *Cochrane Database Syst Rev*  
38 2012;12:CD003267. doi: 10.1002/14651858.CD003267.pub2 [published Online First:  
39 2012/12/14]  
40
- 41 42. Arksey H, O'Malley L. Scoping studies: towards a methodological framework.  
42 *International Journal of Social Research Methodology* 2005;8(1):19-32. doi:  
43 10.1080/1364557032000119616  
44
- 45 43. Levac D, Colquhoun H, O'Brien KK. Scoping studies: advancing the methodology.  
46 *Implementation Science* 2010;5(1):69. doi: 10.1186/1748-5908-5-69  
47
- 48 44. Daudt HM, van Mossel C, Scott SJ. Enhancing the scoping study methodology: a large,  
49 inter-professional team's experience with Arksey and O'Malley's framework. *BMC Medical*  
50 *Research Methodology* 2013;13(1):48. doi: 10.1186/1471-2288-13-48  
51
- 52 45. Colquhoun HL, Levac D, O'Brien KK, et al. Scoping reviews: time for clarity in definition,  
53 methods, and reporting. *J Clin Epidemiol* 2014;67(12):1291-4. doi:  
54 10.1016/j.jclinepi.2014.03.013 [published Online First: 2014/07/19]  
55  
56  
57  
58

- 1  
2  
3 46. Tricco AC, Lillie E, Zarin W, et al. Prisma extension for scoping reviews (PRISMA-ScR):  
4 Checklist and explanation. *Annals of Internal Medicine* 2018 doi: 10.7326/M18-0850  
5
- 6 47. Joanna Briggs Institute. The Joanna Briggs Institute Reviewers' Manual 2015:  
7 Methodology for JBI Scoping Reviews. Australia, 2015.  
8
- 9 48. Center for Open Science. Open Science Framework Charlottesville, VA2011 [cited 2018].  
10 Available from: <https://osf.io> accessed 07-MAY-2018.  
11
- 12 49. DistillerSR: Systematic Review and Literature Review Software [program]. Ottawa,  
13 Canada: Evidence Partners, 2016.  
14
- 15 50. Kelly JF, Saitz R, Wakeman S. Language, Substance Use Disorders, and Policy: The Need  
16 to Reach Consensus on an "Addiction-ary". *Alcoholism Treatment Quarterly*  
17 2016;34(1):116-23. doi: 10.1080/07347324.2016.1113103  
18
- 19 51. Broyles LM, Binswanger IA, Jenkins JA, et al. Confronting inadvertent stigma and  
20 pejorative language in addiction scholarship: a recognition and response. *Subst Abuse*  
21 2014;35(3):217-21. doi: 10.1080/08897077.2014.930372 [published Online First:  
22 2014/06/10]  
23
- 24 52. Barrio P, Gual A. Patient-centered care interventions for the management of alcohol use  
25 disorders: a systematic review of randomized controlled trials. *Patient Prefer Adherence*  
26 2016;10:1823-45. doi: 10.2147/ppa.s109641 [published Online First: 2016/10/04]  
27
- 28 53. Friedrichs A, Spies M, Härter M, et al. Patient preferences and Shared Decision Making  
29 in the treatment of substance use disorders: A systematic review of the literature. *PLoS*  
30 *ONE* 2016;11(1)  
31
- 32 54. Schwartz RP, Kelly SM, Mitchell SG, et al. Patient-centered methadone treatment: a  
33 randomized clinical trial. *Addiction* 2017;112(3):454-64. doi: 10.1111/add.13622  
34
- 35 55. Joosten E, de Weert G, Sensky T, et al. Effect of shared decision-making on therapeutic  
36 alliance in addiction health care. *Patient Prefer Adherence* 2008;2:277-85. [published  
37 Online First: 2008/01/01]  
38
- 39 56. Joosten EAG, De Weert-Van Oene GH, Sensky T, et al. Treatment Goals in Addiction  
40 Healthcare: the Perspectives of Patients and Clinicians. *International Journal of Social*  
41 *Psychiatry* 2010;57(3):263-76. doi: 10.1177/0020764009354835  
42
- 43 57. McGowan J, Sampson M, Salzwedel DM, et al. PRESS Peer Review of Electronic Search  
44 Strategies: 2015 Guideline Statement. *J Clin Epidemiol* 2016;75:40-6. doi:  
45 10.1016/j.jclinepi.2016.01.021 [published Online First: 2016/03/24]  
46
- 47 58. Canadian Agency for Drugs and Technologies in Health. Grey Matters: a practical tool  
48 for searching health-related grey literature. 2015 [Available from:  
49 <https://www.cadth.ca/resources/finding-evidence/grey-matters> accessed November 22,  
50 2017.  
51
- 52 59. Hsieh H-F, Shannon SE. Three Approaches to Qualitative Content Analysis. *Qualitative*  
53 *Health Research* 2005;15(9):1277-88. doi: 10.1177/1049732305276687  
54
- 55 60. MAXQDA. Qualitative Analysis Software [program], 2015.  
56  
57  
58

1  
2  
3 61. Oviedo-Joekes E, Marchand K, Palis H, et al. Predictors of treatment allocation guesses  
4 in a randomized controlled trial testing double-blind injectable hydromorphone and  
5 diacetylmorphine for severe opioid use disorder. *Addiction Research & Theory*  
6 2017;25(4):263-72. doi: 10.1080/16066359.2016.1263729  
7

8 62. Oviedo-Joekes E, Marchand K, Lock K, et al. A chance to stop and breathe: participants'  
9 experiences in the North American Opiate Medication Initiative clinical trial. *Addiction*  
10 *science & clinical practice* 2014;9:21-31. doi: 10.1186/1940-0640-9-21 [published Online  
11 First: 2014/09/30]  
12  
13  
14  
15  
16  
17  
18  
19  
20  
21  
22  
23  
24  
25  
26  
27  
28  
29  
30  
31  
32  
33  
34  
35  
36  
37  
38  
39  
40  
41  
42  
43  
44  
45  
46  
47  
48  
49  
50  
51  
52  
53  
54  
55  
56  
57  
58

For peer review only

# PRISMA-P Checklist

|    |                           | Reporting Item                                                                                                                                                                                     | Page Number |
|----|---------------------------|----------------------------------------------------------------------------------------------------------------------------------------------------------------------------------------------------|-------------|
| 10 | Identification            | #1a Identify the report as a protocol of a systematic review                                                                                                                                       | 1           |
| 13 | Update                    | #1b If the protocol is for an update of a previous systematic review, identify as such                                                                                                             | NA          |
| 17 |                           | #2 If registered, provide the name of the registry (such as PROSPERO) and registration number                                                                                                      | 2           |
| 21 | Contact                   | #3a Provide name, institutional affiliation, e-mail address of all protocol authors; provide physical mailing address of corresponding author                                                      | 1           |
| 26 | Contribution              | #3b Describe contributions of protocol authors and identify the guarantor of the review                                                                                                            | 10          |
| 31 |                           | #4 If the protocol represents an amendment of a previously completed or published protocol, identify as such and list changes; otherwise, state plan for documenting important protocol amendments | NA          |
| 37 | Sources                   | #5a Indicate sources of financial or other support for the review                                                                                                                                  | 10          |
| 40 | Sponsor                   | #5b Provide name for the review funder and / or sponsor                                                                                                                                            | 10          |
| 42 | Role of sponsor or funder | #5c Describe roles of funder(s), sponsor(s), and / or institution(s), if any, in developing the protocol                                                                                           | 10          |
| 46 | Rationale                 | #6 Describe the rationale for the review in the context of what is already known                                                                                                                   | 3-4         |
| 50 | Objectives                | #7 Provide an explicit statement of the question(s) the review will address with reference to participants, interventions, comparators, and outcomes (PICO)                                        | 4-5         |
| 55 | Eligibility criteria      | #8 Specify the study characteristics (such as PICO, study design, setting, time frame) and report characteristics (such as years considered, language, publication status) to be                   | 6-7         |

used as criteria for eligibility for the review

|    |                    |      |                                                                 |            |
|----|--------------------|------|-----------------------------------------------------------------|------------|
| 1  |                    |      |                                                                 |            |
| 2  |                    |      |                                                                 |            |
| 3  | Information        | #9   | Describe all intended information sources (such as              | 5-6        |
| 4  | sources            |      | electronic databases, contact with study authors, trial         |            |
| 5  |                    |      | registers or other grey literature sources) with planned        |            |
| 6  |                    |      | dates of coverage                                               |            |
| 7  |                    |      |                                                                 |            |
| 8  |                    |      |                                                                 |            |
| 9  |                    |      |                                                                 |            |
| 10 | Search strategy    | #10  | Present draft of search strategy to be used for at least one    | Supplement |
| 11 |                    |      | electronic database, including planned limits, such that it     | 2          |
| 12 |                    |      | could be repeated                                               |            |
| 13 |                    |      |                                                                 |            |
| 14 |                    |      |                                                                 |            |
| 15 | Study records -    | #11a | Describe the mechanism(s) that will be used to manage           | 4          |
| 16 | data management    |      | records and data throughout the review                          |            |
| 17 |                    |      |                                                                 |            |
| 18 |                    |      |                                                                 |            |
| 19 | Study records -    | #11b | State the process that will be used for selecting studies       | 6          |
| 20 | selection process  |      | (such as two independent reviewers) through each phase          |            |
| 21 |                    |      | of the review (that is, screening, eligibility and inclusion in |            |
| 22 |                    |      | meta-analysis)                                                  |            |
| 23 |                    |      |                                                                 |            |
| 24 |                    |      |                                                                 |            |
| 25 |                    |      |                                                                 |            |
| 26 | Study records -    | #11c | Describe planned method of extracting data from reports         | 7          |
| 27 | data collection    |      | (such as piloting forms, done independently, in duplicate),     |            |
| 28 | process            |      | any processes for obtaining and confirming data from            |            |
| 29 |                    |      | investigators                                                   |            |
| 30 |                    |      |                                                                 |            |
| 31 |                    |      |                                                                 |            |
| 32 |                    |      |                                                                 |            |
| 33 | Data items         | #12  | List and define all variables for which data will be sought     | 7-8        |
| 34 |                    |      | (such as PICO items, funding sources), any pre-planned          |            |
| 35 |                    |      | data assumptions and simplifications                            |            |
| 36 |                    |      |                                                                 |            |
| 37 |                    |      |                                                                 |            |
| 38 |                    |      |                                                                 |            |
| 39 | Outcomes and       | #13  | List and define all outcomes for which data will be sought,     | 7          |
| 40 | prioritization     |      | including prioritization of main and additional outcomes,       |            |
| 41 |                    |      | with rationale                                                  |            |
| 42 |                    |      |                                                                 |            |
| 43 |                    |      |                                                                 |            |
| 44 | Risk of bias in    | #14  | Describe anticipated methods for assessing risk of bias of      | See note 1 |
| 45 | individual studies |      | individual studies, including whether this will be done at the  |            |
| 46 |                    |      | outcome or study level, or both; state how this information     |            |
| 47 |                    |      | will be used in data synthesis                                  |            |
| 48 |                    |      |                                                                 |            |
| 49 |                    |      |                                                                 |            |
| 50 |                    |      |                                                                 |            |
| 51 | Data synthesis     | #15a | Describe criteria under which study data will be                | 8-9        |
| 52 |                    |      | quantitatively synthesised                                      |            |
| 53 |                    |      |                                                                 |            |
| 54 |                    |      |                                                                 |            |
| 55 |                    | #15b | If data are appropriate for quantitative synthesis, describe    | 8-9        |
| 56 |                    |      | planned summary measures, methods of handling data and          |            |
| 57 |                    |      | methods of combining data from studies, including any           |            |
| 58 |                    |      |                                                                 |            |
| 59 |                    |      |                                                                 |            |
| 60 |                    |      |                                                                 |            |

planned exploration of consistency (such as I<sup>2</sup>, Kendall's  $\tau$ )

#15c Describe any proposed additional analyses (such as sensitivity or subgroup analyses, meta-regression) 8-9

#15d If quantitative synthesis is not appropriate, describe the type of summary planned 8-9

Meta-bias(es) #16 Specify any planned assessment of meta-bias(es) (such as publication bias across studies, selective reporting within studies) See note 2

Confidence in cumulative evidence #17 Describe how the strength of the body of evidence will be assessed (such as GRADE) See note 3

## Author notes

1. NA for scoping review
2. NA for scoping reviews
3. NA for scoping reviews

The PRISMA-P checklist is distributed under the terms of the Creative Commons Attribution License CC-BY 4.0. This checklist was completed on 02. June 2018 using <http://www.goodreports.org/>, a tool made by the [EQUATOR Network](#) in collaboration with [Penelope.ai](#)

**Table 1. Medline (Ovid) search strategy**

| Search term/line number | Conceptual term of interest | Search term entered into Ovid-Medline                                                 | Number of hits |
|-------------------------|-----------------------------|---------------------------------------------------------------------------------------|----------------|
| 1                       | Substance-Related Disorders | exp Substance-Related Disorders                                                       | 258462         |
| 2                       | Street Drugs                | exp Street Drugs                                                                      | 11263          |
| 3                       | Substance abuser            | substance abus*                                                                       | 49532          |
| 4                       | Substance dependent         | substance dependen*                                                                   | 2720           |
| 5                       | Substance misuse            | substance misus*                                                                      | 2150           |
| 6                       | Problematic substance use   | Problematic substance adj2 (use* or usage or using)                                   | 254            |
| 7                       | People who inject drugs     | (people who inject drug* or PWID)                                                     | 1740           |
| 8                       | Injection drug use          | injection drug "(use or user or usage or using)" or IDU                               | 2794           |
| 9                       | People who use drugs        | "people who use drugs" or PWUD                                                        | 343            |
| 10                      | Illicit substance use       | (illicit or street or illegal) adj2 (drug or substance) adj2 (use* or usage or using) | 5848           |
| 11                      | opioid dependence           | opioid adj2 (addict* or abus* or dependen* or misus* or problem* or disorder*)        | 15537          |
| 12                      | opiate dependence           | opiate adj2 (addict* or abus* or dependen* or misus* or problem* or disorder*)        | 3475           |
| 13                      | narcotic dependence         | narcotic adj2 (addict* or abus* or dependen* or misus* or problem* or disorder*)      | 1279           |
| 14                      | heroin                      | heroin                                                                                | 17865          |
| 15                      | stimulant use disorder      | "stimulant use disorder"                                                              | 40             |

|    |                                                                 |                                                                                                                                          |        |
|----|-----------------------------------------------------------------|------------------------------------------------------------------------------------------------------------------------------------------|--------|
| 16 | exp crack cocaine                                               | exp crack cocaine                                                                                                                        | 1343   |
| 17 | exp cocaine smoking                                             | exp cocaine smoking                                                                                                                      | 4      |
| 18 | cocaine dependence                                              | ((cocaine or crack) adj2 (addict* or abus* or dependen* or misus* or problem* or disorder*))                                             | 11806  |
| 19 | amphetamine dependence                                          | (amphetamine or crystal methamphetamine or crystal meth) adj1 (addict* or abus* or dependen* or misus* or problem* or disorder*)         | 592    |
| 20 | alcohol dependence                                              | alcohol adj2 (addict* or abus* or dependen* or misus* or problem* or disorder*)                                                          | 50104  |
| 21 | cannabis dependence                                             | cannabis adj2 (addict* or abus* or dependen* or disorder*)                                                                               | 1917   |
| 22 | tobacco dependence                                              | (tobacco or nicotine or smok*) adj2 (dependen* or disorder* or cessation)                                                                | 45598  |
| 23 | Diagnosis, Dual (Psychiatry)                                    | Diagnosis, Dual (Psychiatry)                                                                                                             | 3372   |
| 24 |                                                                 | 1 or 2 or 3 or 4 or 5 or 6 or 7 or 8 or 9 or 10 or 11 or 12 or 13 or 14 or 15 or 16 or 17 or 18 or 19 or 20 or 21 or 22 or 23            | 337412 |
| 25 | exp Patient-Centered Care                                       | exp Patient-Centered Care                                                                                                                | 16653  |
| 26 | Patient centered care                                           | ((patient or client or person) adj1 cent?red adj1 (care or treatment* or therap*))                                                       | 20713  |
| 27 | Patient focused care                                            | ((patient or client or person) adj1 focus?ed adj1 (care or treatment* or therap*))                                                       | 425    |
| 28 | Patient participation in treatment planning, process, decisions | (patient or client) adj1 (autonom* or involve* or control or empower*) adj1 (decision making or care or practic* or treatment* or plan*) | 126    |
| 29 | Collaborative care                                              | collaborative adj1 (care or practic* or treatment* or plan*)                                                                             | 3803   |
| 30 | Shared decision-making                                          | (shared or joint or collaborative) adj2 decision making                                                                                  | 6279   |
| 31 | Therapeutic alliance                                            | therapeutic alliance                                                                                                                     | 9027   |
| 32 | Relational practice                                             | relational practic*                                                                                                                      | 44     |

|    |                                         |                                                                                                                                         |            |
|----|-----------------------------------------|-----------------------------------------------------------------------------------------------------------------------------------------|------------|
| 33 | Enhanced patient-provider relationship  | (physician or doctor or nurse or professional or provider) adj1 (patient or client) adj1 (enhanc* or alliance* or empower* or support*) | 304        |
| 34 | Enhanced patient-provider communication | (physician or doctor or nurse or professional or provider) adj1 (patient or client) adj1 communicat*                                    | 4230       |
| 35 | Holistic Nursing                        | Holistic Nursing/                                                                                                                       | 3135       |
| 36 | Trauma informed care                    | trauma adj1 (cent?red or informed) adj1 (care or approach or treatment* or therap*)                                                     | 263        |
| 37 | Culturally safe care                    | cultural* adj1 (safe or sensitive) adj1 (care or approach or treatment* or therap*)                                                     | 395        |
| 39 | Family Systems Nursing                  | Family Systems Nursing                                                                                                                  | 64         |
| 39 | Expert patient program                  | expert patient program*                                                                                                                 | 27         |
| 40 |                                         | 25 or 26 or 27 or 28 or 29 or 30 or 31 or 32 or 33 or 34 or 35 or 36 or 37 or 38 or 39                                                  | 40281      |
| 41 |                                         | <b>24 and 40</b>                                                                                                                        | <b>896</b> |

Update and Run Date: June 27, 2018
