# Supplementary material for: Patient-centred care for addiction treatment: a scoping review protocol
Source: PubMed Central journal article supplement — BMJ Open. 2018 Dec 27;8(12):e024588. doi: 10.1136/bmjopen-2018-024588 (PMC6318507; doi:10.1136/bmjopen-2018-024588), 2018-12-27
Supplement: bmjopen-2018-024588supp001.pdf [file bmjopen-2018-024588supp001.pdf]

# PRISMA-P Checklist

|                           |     | Reporting Item                                                                                                                                                                                  | Page Number |
|---------------------------|-----|-------------------------------------------------------------------------------------------------------------------------------------------------------------------------------------------------|-------------|
| Identification            | #1a | Identify the report as a protocol of a systematic review                                                                                                                                        | 1           |
| Update                    | #1b | If the protocol is for an update of a previous systematic review, identify as such                                                                                                              | NA          |
|                           | #2  | If registered, provide the name of the registry (such as PROSPERO) and registration number                                                                                                      | 2           |
| Contact                   | #3a | Provide name, institutional affiliation, e-mail address of all protocol authors; provide physical mailing address of corresponding author                                                       | 1           |
| Contribution              | #3b | Describe contributions of protocol authors and identify the guarantor of the review                                                                                                             | 10          |
|                           | #4  | If the protocol represents an amendment of a previously completed or published protocol, identify as such and list changes; otherwise, state plan for documenting important protocol amendments | NA          |
| Sources                   | #5a | Indicate sources of financial or other support for the review                                                                                                                                   | 10          |
| Sponsor                   | #5b | Provide name for the review funder and / or sponsor                                                                                                                                             | 10          |
| Role of sponsor or funder | #5c | Describe roles of funder(s), sponsor(s), and / or institution(s), if any, in developing the protocol                                                                                            | 10          |
| Rationale                 | #6  | Describe the rationale for the review in the context of what is already known                                                                                                                   | 3-4         |
| Objectives                | #7  | Provide an explicit statement of the question(s) the review will address with reference to participants, interventions, comparators, and outcomes (PICO)                                        | 4-5         |
| Eligibility criteria      | #8  | Specify the study characteristics (such as PICO, study design, setting, time frame) and report characteristics (such as years considered, language, publication status) to be                   | 6-7         |

used as criteria for eligibility for the review

|                                         |      |                                                                                                                                                                                                                      |              |
|-----------------------------------------|------|----------------------------------------------------------------------------------------------------------------------------------------------------------------------------------------------------------------------|--------------|
| Information sources                     | #9   | Describe all intended information sources (such as electronic databases, contact with study authors, trial registers or other grey literature sources) with planned dates of coverage                                | 5-6          |
| Search strategy                         | #10  | Present draft of search strategy to be used for at least one electronic database, including planned limits, such that it could be repeated                                                                           | Supplement 2 |
| Study records - data management         | #11a | Describe the mechanism(s) that will be used to manage records and data throughout the review                                                                                                                         | 4            |
| Study records - selection process       | #11b | State the process that will be used for selecting studies (such as two independent reviewers) through each phase of the review (that is, screening, eligibility and inclusion in meta-analysis)                      | 6            |
| Study records - data collection process | #11c | Describe planned method of extracting data from reports (such as piloting forms, done independently, in duplicate), any processes for obtaining and confirming data from investigators                               | 7            |
| Data items                              | #12  | List and define all variables for which data will be sought (such as PICO items, funding sources), any pre-planned data assumptions and simplifications                                                              | 7-8          |
| Outcomes and prioritization             | #13  | List and define all outcomes for which data will be sought, including prioritization of main and additional outcomes, with rationale                                                                                 | 7            |
| Risk of bias in individual studies      | #14  | Describe anticipated methods for assessing risk of bias of individual studies, including whether this will be done at the outcome or study level, or both; state how this information will be used in data synthesis | See note 1   |
| Data synthesis                          | #15a | Describe criteria under which study data will be quantitatively synthesised                                                                                                                                          | 8-9          |
|                                         | #15b | If data are appropriate for quantitative synthesis, describe planned summary measures, methods of handling data and methods of combining data from studies, including any                                            | 8-9          |

|                                   |      |                                                                                                                               |            |
|-----------------------------------|------|-------------------------------------------------------------------------------------------------------------------------------|------------|
|                                   |      | planned exploration of consistency (such as I <sup>2</sup> , Kendall's $\tau$ )                                               |            |
|                                   | #15c | Describe any proposed additional analyses (such as sensitivity or subgroup analyses, meta-regression)                         | 8-9        |
|                                   | #15d | If quantitative synthesis is not appropriate, describe the type of summary planned                                            | 8-9        |
| Meta-bias(es)                     | #16  | Specify any planned assessment of meta-bias(es) (such as publication bias across studies, selective reporting within studies) | See note 2 |
| Confidence in cumulative evidence | #17  | Describe how the strength of the body of evidence will be assessed (such as GRADE)                                            | See note 3 |

## Author notes

1. NA for scoping review
2. NA for scoping reviews
3. NA for scoping reviews

The PRISMA-P checklist is distributed under the terms of the Creative Commons Attribution License CC-BY 4.0. This checklist was completed on 02. June 2018 using <http://www.goodreports.org/>, a tool made by the [EQUATOR Network](#) in collaboration with [Penelope.ai](#)
