# Supplementary material for: Patient-centred care for addiction treatment: a scoping review protocol
Source: PubMed Central journal article supplement — BMJ Open. 2018 Dec 27;8(12):e024588. doi: 10.1136/bmjopen-2018-024588 (PMC6318507; doi:10.1136/bmjopen-2018-024588), 2018-12-27
Supplement: bmjopen-2018-024588supp002.pdf [file bmjopen-2018-024588supp002.pdf]

**Table 1. Medline (Ovid) search strategy**

| <b>Search term/line number</b> | <b>Conceptual term of interest</b> | <b>Search term entered into Ovid-Medline</b>                                          | <b>Number of hits</b> |
|--------------------------------|------------------------------------|---------------------------------------------------------------------------------------|-----------------------|
| 1                              | Substance-Related Disorders        | exp Substance-Related Disorders                                                       | 258462                |
| 2                              | Street Drugs                       | exp Street Drugs                                                                      | 11263                 |
| 3                              | Substance abuser                   | substance abus*                                                                       | 49532                 |
| 4                              | Substance dependent                | substance dependen*                                                                   | 2720                  |
| 5                              | Substance misuse                   | substance misus*                                                                      | 2150                  |
| 6                              | Problematic substance use          | Problematic substance adj2 (use* or usage or using)                                   | 254                   |
| 7                              | People who inject drugs            | (people who inject drug* or PWID)                                                     | 1740                  |
| 8                              | Injection drug use                 | injection drug "(use or user or usage or using)" or IDU                               | 2794                  |
| 9                              | People who use drugs               | "people who use drugs" or PWUD                                                        | 343                   |
| 10                             | Illicit substance use              | (illicit or street or illegal) adj2 (drug or substance) adj2 (use* or usage or using) | 5848                  |
| 11                             | opioid dependence                  | opioid adj2 (addict* or abus* or dependen* or misus* or problem* or disorder*)        | 15537                 |
| 12                             | opiate dependence                  | opiate adj2 (addict* or abus* or dependen* or misus* or problem* or disorder*)        | 3475                  |
| 13                             | narcotic dependence                | narcotic adj2 (addict* or abus* or dependen* or misus* or problem* or disorder*)      | 1279                  |
| 14                             | heroin                             | heroin                                                                                | 17865                 |
| 15                             | stimulant use disorder             | "stimulant use disorder"                                                              | 40                    |

|    |                                                                 |                                                                                                                                          |        |
|----|-----------------------------------------------------------------|------------------------------------------------------------------------------------------------------------------------------------------|--------|
| 16 | exp crack cocaine                                               | exp crack cocaine                                                                                                                        | 1343   |
| 17 | exp cocaine smoking                                             | exp cocaine smoking                                                                                                                      | 4      |
| 18 | cocaine dependence                                              | ((cocaine or crack) adj2 (addict* or abus* or dependen* or misus* or problem* or disorder*))                                             | 11806  |
| 19 | amphetamine dependence                                          | (amphetamine or crystal methamphetamine or crystal meth) adj1 (addict* or abus* or dependen* or misus* or problem* or disorder*)         | 592    |
| 20 | alcohol dependence                                              | alcohol adj2 (addict* or abus* or dependen* or misus* or problem* or disorder*)                                                          | 50104  |
| 21 | cannabis dependence                                             | cannabis adj2 (addict* or abus* or dependen* or disorder*)                                                                               | 1917   |
| 22 | tobacco dependence                                              | (tobacco or nicotine or smok*) adj2 (dependen* or disorder* or cessation)                                                                | 45598  |
| 23 | Diagnosis, Dual (Psychiatry)                                    | Diagnosis, Dual (Psychiatry)                                                                                                             | 3372   |
| 24 |                                                                 | 1 or 2 or 3 or 4 or 5 or 6 or 7 or 8 or 9 or 10 or 11 or 12 or 13 or 14 or 15 or 16 or 17 or 18 or 19 or 20 or 21 or 22 or 23            | 337412 |
| 25 | exp Patient-Centered Care                                       | exp Patient-Centered Care                                                                                                                | 16653  |
| 26 | Patient centered care                                           | ((patient or client or person) adj1 cent?red adj1 (care or treatment* or therap*))                                                       | 20713  |
| 27 | Patient focused care                                            | ((patient or client or person) adj1 focus?ed adj1 (care or treatment* or therap*))                                                       | 425    |
| 28 | Patient participation in treatment planning, process, decisions | (patient or client) adj1 (autonom* or involve* or control or empower*) adj1 (decision making or care or practic* or treatment* or plan*) | 126    |
| 29 | Collaborative care                                              | collaborative adj1 (care or practic* or treatment* or plan*)                                                                             | 3803   |
| 30 | Shared decision-making                                          | (shared or joint or collaborative) adj2 decision making                                                                                  | 6279   |
| 31 | Therapeutic alliance                                            | therapeutic alliance                                                                                                                     | 9027   |
| 32 | Relational practice                                             | relational practic*                                                                                                                      | 44     |

|    |                                         |                                                                                                                                         |            |
|----|-----------------------------------------|-----------------------------------------------------------------------------------------------------------------------------------------|------------|
| 33 | Enhanced patient-provider relationship  | (physician or doctor or nurse or professional or provider) adj1 (patient or client) adj1 (enhanc* or alliance* or empower* or support*) | 304        |
| 34 | Enhanced patient-provider communication | (physician or doctor or nurse or professional or provider) adj1 (patient or client) adj1 communicat*                                    | 4230       |
| 35 | Holistic Nursing                        | Holistic Nursing/                                                                                                                       | 3135       |
| 36 | Trauma informed care                    | trauma adj1 (cent?red or informed) adj1 (care or approach or treatment* or therap*)                                                     | 263        |
| 37 | Culturally safe care                    | cultural* adj1 (safe or sensitive) adj1 (care or approach or treatment* or therap*)                                                     | 395        |
| 39 | Family Systems Nursing                  | Family Systems Nursing                                                                                                                  | 64         |
| 39 | Expert patient program                  | expert patient program*                                                                                                                 | 27         |
| 40 |                                         | 25 or 26 or 27 or 28 or 29 or 30 or 31 or 32 or 33 or 34 or 35 or 36 or 37 or 38 or 39                                                  | 40281      |
| 41 |                                         | <b>24 and 40</b>                                                                                                                        | <b>896</b> |

Update and Run Date: June 27, 2018
